# 1 Weak Task Synchronization of 2 Default Mode Network in Task Based 3 Paradigms

4 Vaibhav Tripathi<sup>1,\*</sup> and Rahul Garg<sup>2,3,4</sup>

\*For correspondence:

[vaibhavt@bu.edu](mailto:vaibhavt@bu.edu) (VT)

Present address: <sup>†</sup>Department of  
Psychological and Brain Sciences,  
Boston University, Boston, MA, USA  
02215; <sup>‡</sup>Amar Nath and Shashi  
Khosla School of Information  
Technology, Indian Institute of  
Technology, Delhi, 110052, India

5 <sup>1</sup>Department of Psychological and Brain Sciences, Boston University; <sup>2</sup>Department of  
6 Computer Science and Engineering, Indian Institute of Technology, Delhi; <sup>3</sup>Amar Nath and  
7 Shashi Khosla School of Information Technology, Indian Institute of Technology, Delhi;  
8 <sup>4</sup>National Resource Centre for Value Education in Engineering, Indian Institute of  
9 Technology, Delhi

---

11 **Abstract** Default Mode Network (DMN) has been called a "task-negative" network which  
12 deactivates during engaging extrinsic tasks. But the behavior is more nuanced. We analyse the  
13 DMN during three different tasks (visual, affect and language; n=54) and find inter trial variability  
14 which gets amiss when analysed using General Linear Model (GLM). The region also shows  
15 significant across subjects variations which limits the use of Inter Subject Correlation (ISC) method  
16 to detect correlated deactivations during the task. We introduce Temporal Synchronization Analysis  
17 (TSA), a family of methods that can help detect inter-trial (IT-TSA) and inter-subject (IS-TSA)  
18 synchronization across the brain. We find that DMN is weakly synchronized across trials and  
19 subjects, challenging the notion of task negative behavior. Our study suggests the role of DMN as  
20 an active component associated with self-referential, autobiographical processes which are  
21 deactivated differentially and non linearly across trials and subjects in the presence of extrinsic  
22 processes.

---

## 24 Introduction

25 The discovery of default mode network was one of the significant findings by cognitive neuroscien-  
26 tists in the past few decades. The accidental observation (*Buckner et al., 1995; Andreasen et al.,*  
27 *1995*) made while examining the Positron Emission Tomography (PET) images of subjects engaged  
28 in externally focused, attention demanding tasks, found that the tasks reduced the activities of  
29 several brain regions, when compared with a passive condition (*Shulman et al., 1997*). Since then  
30 a series of studies using task-based fMRI (*Raichle et al., 2001; Shmuel et al., 2002; Mckiernan*  
31 *et al., 2003*) PET (*Gusnard and Raichle, 2001; Mazoyer et al., 2001*), resting state fMRI (*Binder et al.,*  
32 *1999; Gusnard and Raichle, 2001; Raichle et al., 2001*) and more recently using the direct neuronal  
33 recordings of the local field potentials (LFPs) (*Logothetis and Wandell, 2004; Ojemann et al., 2013*)  
34 have confirmed these findings using a variety of task conditions and experimental paradigms. Quite  
35 surprisingly, these studies found that the same brain regions consistently show a task-induced  
36 reduction of activity irrespective of the task, as long as the task is externally-focused and attention  
37 demanding (see (*Raichle, 2015; Buckner and DiNicola, 2019*) for reviews). These regions comprised  
38 of frontal midline, posterior cingulate cortex, inferior parietal lobule, and medial temporal lobe  
39 (*Christoff et al., 2016*) together are now called the default mode network (DMN) of the brain, in-  
40 dicated that these regions are activated in the "default mode" of brain function when there is no

41 externally-focused, attention-demanding task at hand.

42 Early studies on function connectivity analysis of resting state fMRI has revealed two anticorrelated  
43 brain networks (*Fox et al., 2005; Fransson, 2005*) working in tandem with each other. One of  
44 the networks, called the task-negative network is the default mode network (*Greicius and Menon,*  
45 *2004*), while the other network, which is negatively correlated to the DMN in resting state comprise  
46 of superior parietal lobule, intraparietal sulcus, frontal eye fields, and ventral premotor cortex and is  
47 called the Dorsal Attention Network (DAN). The networks themselves are strongly correlated within  
48 and anticorrelated to each other (*Fox et al., 2005*). The DAN is involved in attention demanding  
49 extrinsic tasks whereas the DMN is found to be activated during internal self referential processing  
50 (*Jessica R. Andrews-Hanna, 2012*). Such anticorrelations were found to be affected by cognitive  
51 states, changed across default subsystems and affected by preprocessing methods (*Dixon et al.,*  
52 *2017*)

53 Although, believed to be task-negative, studies have shown that the behavior of the DMN is more  
54 nuanced (*Mckiernan et al., 2003; Greicius and Menon, 2004*). Deactivations in the DMN increased  
55 with task difficulty (*Singh and Fawcett, 2008*) and task demands (*Polli et al., 2005*). Task complexity  
56 results in gamma suppressions in the DMN regions when investigated using intracranial EEG in a  
57 cohort of epileptic patients (*Ossandon et al., 2011*). DMN activity is predictive of errors (*Li et al.,*  
58 *2007*). A study analysing the default mode of cats found that the anticorrelations between the  
59 DMN and the DAN were found only 20% of the time suggesting role of DMN in attention (*Popa*  
60 *et al., 2009*). People with disorders like ADHD, Parkinson's disease, Alzheimer's have shown to have  
61 differential connectivity in the DMN which can be altered using drugs (*Mohan et al., 2016*). The  
62 recent use of continuous attention tasks demonstrated a complex dynamics between DAN-DMN  
63 activity with task load and attentional control (*Esterman et al., 2013*). Another study found variable  
64 dynamics of the DMN-DAN interactions which are altered by the fronto parietal control network  
65 (FPCN) (*Dixon et al., 2017*). Studies that use naturalistic stimuli to study patterns of activity in  
66 the brain (*Hasson, 2004; Hasson et al., 2008; Simony et al., 2016*) using methods like Intersubject  
67 correlation (ISC) and Intersubject functional correlations (ISFC) have found that the default mode  
68 network reconfigures from task positive to task negative during a naturalistic stimuli. Internal  
69 mentation and external monitoring are two leading hypotheses that can be used to describe such a  
70 nuanced behavior (*Buckner et al., 2008*).

71 Recent work has suggested that DMN may not be a single network but composed of three  
72 different subsystems (*Christoff et al., 2016; Buckner et al., 2008*). The exact functions of each of  
73 these DMN subsystems is still a subject of active research. Ventro-medial PFC reflects the emotional  
74 state of the subject whereas the dorsal medial PFC is engaged in self-referential judgements  
75 and the activity between both the regions are anti-correlated suggesting difference in the times  
76 when these regions are activated (*Raichle, 2015*) The posterior regions of the DMN are more  
77 associated with autobiographical memory, emotional and self-referential processing (*Raichle, 2015;*  
78 *Christoff et al., 2016*). The MTL subsystem of the DMN is engaged during mnemonic processes,  
79 autobiographical memories and recollection based tasks (*Jessica R. Andrews-Hanna, 2012*). The  
80 posterior cingulate cortex and the anterior mPFC has shown hub like properties as analysed using  
81 functional connectivity. Recent studies have shown involvement of the DMN in task-unconstrained  
82 thoughts, mind wandering as well as rumination (*Christoff et al., 2016; Nathan Spreng, 2012;*  
83 *Christoff et al., 2009*). Some studies have shown that the not only there are multiple networks  
84 but these are tightly interwoven across the three large subsystems (*Braga and Buckner, 2017;*  
85 *DiNicola et al., 2020; Buckner and DiNicola, 2019*). As more and more studies from the diverse  
86 fields of emotional, social and behavioral neuroscience emerge, along with large amounts of data  
87 per individual, the exact functions of the different regions in the DMN may be elucidated.

88 In this paper, we designed a new method called the Temporal Synchronization Analysis (TSA)  
89 which can be applied to multiple trials within a subject or across subjects to determine the synchro-  
90 nization of the BOLD response of different voxels (across trials or subjects) in the brain. We add to  
91 the existing body of literature on default mode network and discover that the DMN regions have

92 weaker inter-trial and inter-subject stimulus-locked synchronization as compared to task-positive  
93 regions of early sensory processing. These results have been found to be consistent in three very  
94 different data sets involving visual-auditory valence, language and craving. Our results demonstrate  
95 that the complexity of the dynamics of regions like DMN is not strictly task-negative as have been  
96 believed since the last two decades and needs to be studied using newer statistical methods. Inter  
97 Subject Correlation (ISC) methods may not be best suited for task based stimulus locked paradigms  
98 to study the task-negative networks. Given the role of DMN in mind-wandering (*Christoff et al.,*  
99 **2016**), our method can be used to create a metric to quantify the stimulus-locked DMN synchroniza-  
100 tion which may be related to the quality of attention control in individuals and predict performance  
101 in cognitive tasks across different populations.

## 102 Results

103 We have detected a weak inter subject synchronization in the brain default mode network (DMN).  
104 The Inter Subject Correlation (ISC) (*Hasson, 2004; Hasson et al., 2008; Kauppi, 2010*) method, which  
105 finds voxels with large (inter-subject) correlated BOLD activity, when applied to a dataset where  
106 the task conditions for all the subjects are perfectly synchronized, is expected to find task-positive  
107 as well as task-negative regions (in the task negative regions, the BOLD signal is expected to  
108 decrease for all the subjects after the stimulus onset, leading to large inter-subject correlations,  
109 see Box 1 for details of the ISC technique). A clear trend can be seen in the scatter plot of GLM  
110 zstat values and ISC correlation values of the voxels in the three datasets studied. In Fig. 1(a),  
111 the task negative voxels with very significant (negative) zstat scores generally tend to have low  
112 inter-subject correlation values unlike most of the task positive voxels which exhibit higher inter-  
113 subject correlations with higher zstat values. When we applied ISC to the FNF dataset, we found  
114 high inter-subject correlations ( $M=0.19$ ,  $SD=0.16$ ) in the BOLD signal of early sensory processing  
115 regions which were significantly higher [independent samples t-test  $t(36215) = 127.25$ ,  $p<0.00001$ ,  
116 Cohen's  $d=1.34$ ] than the task negative default mode network regions ( $M=0.03$ ,  $SD=0.018$ ). ISC  
117 for AV dataset task positive regions ( $M=0.11$ ,  $SD=0.07$ ) was significantly higher [ $t(19877)=129.62$ ,  
118  $p<0.00001$ , Cohen's  $d=1.86$ ] than default mode network regions ( $M=0.015$ ,  $SD=0.12$ ) and for the  
119 BW dataset, the task positive inter subject correlations ( $M=0.072$ ,  $SD=0.05$ ) were higher but with a  
120 medium effect size [ $t(31206)=6.336$ ,  $p<0.00001$ , Cohen's  $d=0.25$ ] than the default mode network  
121 network ISC ( $M=0.05$ ,  $SD=0.02$ ). The time series plots in Fig. 1(b)-(e) of single subject (and subject  
122 averages) of task-positive voxel and task-negative voxel shows that there is a reasonable signal  
123 change in task positive as well as task negative regions during the FNF task.

124 We can compare the GLM activation maps from the three different datasets studied with the  
125 ISC correlation maps in Fig. 2. There is a good overlap between GLM task-positive voxels and the  
126 voxels with significantly high inter-subject correlations in the early sensory processing regions.  
127 This overlap is much reduced in the higher-order processing regions. There is nearly zero overlap  
128 between the GLM task negative regions of the DMN and ISC correlation maps. Table 1 quantifies  
129 the amount of overlap (using metrics defined in the methods section) between active voxels of GLM  
130 and significantly correlated voxels of ISC for different brain regions. Apart from the BW dataset,  
131 there is no overlap between the task negative regions and the ISC correlated voxels. For the task  
132 positive regions there is 33-37% overlap in FNF, 22-23 % overlap in AV and around 61% overlap in  
133 BW.

172 Why do task negative regions (and some later task positive regions), despite having very signifi-  
173 cant z stats values, do not show any significant inter-subject correlations? It is generally believed that  
174 the task negative regions (primarily comprising the default mode network regions) get deactivated  
175 during the presentation of attention demanding stimulus (*Raichle et al., 2001*). However the com-  
176 plete picture is not as straightforward. It turns out that the task-negative regions get deactivated  
177 "on the average" for the duration of task, but such a deactivation may not be strictly stimulus-locked.  
178 There may be a pattern in such deactivation which may differ from subject to subject and trial  
179 to trial. Different subjects (and trials) may get deactivated at different times, decrease in signal

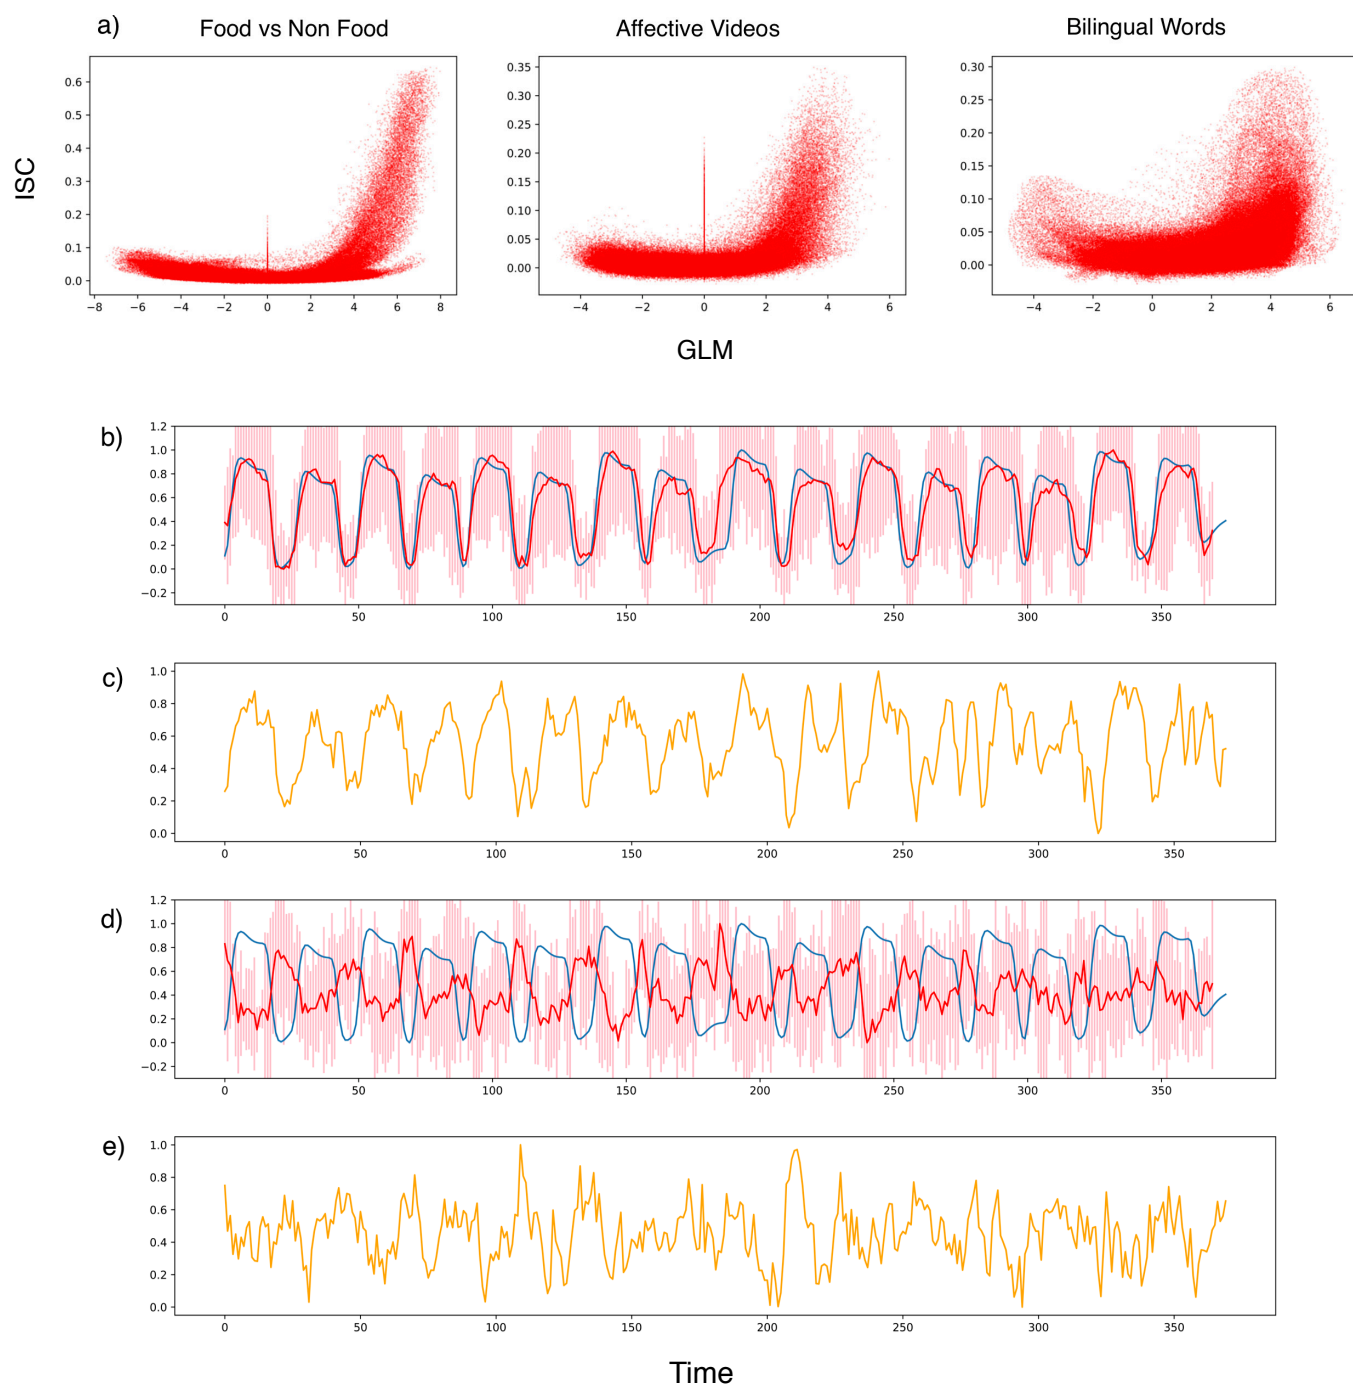

**Figure 1.** a) A scatter plot of Inter subject correlation values vs GLM zstat values for the three datasets: FNF, AV,BW. b) Blue line represents the design matrix of block based design of dataset FNF; Red line represents the averaged percent BOLD signal change for voxel (55,16,34) with maximum GLM zstat value and standard deviation as error bar across subjects. c) Percent BOLD signal change for single subject for voxel (55,16,34). d) Blue line represents the design matrix of block based design of dataset FNF, Red line represents the averaged percent BOLD signal change for voxel (41,27,47) with minimum GLM zstat value and standard deviation as error bar across subjects. e) Percent BOLD signal change for single subject for voxel (41,27,47).



a) Food vs Non Food

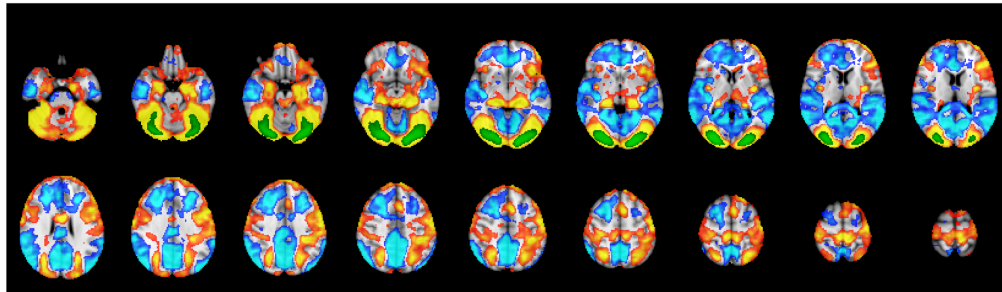

b) Affective Videos

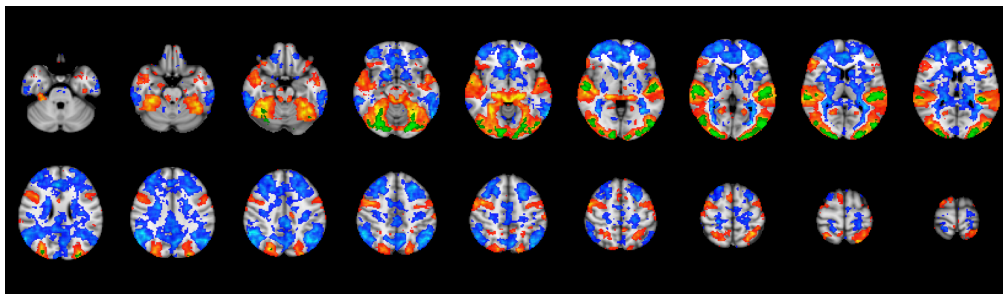

c) Bilingual Words

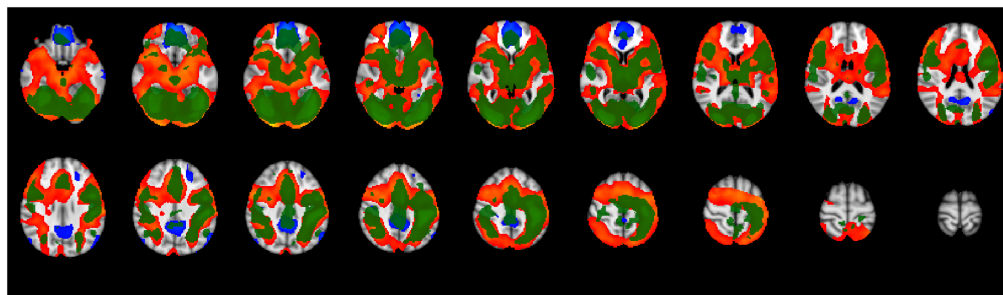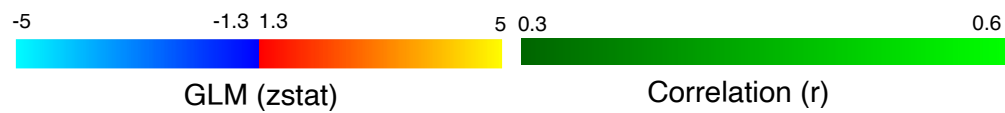

**Figure 2.** Brain maps of the three datasets showing GLM based activations in red/blue and ISC activations in green.

135

## Box 1. Inter Subject Correlation

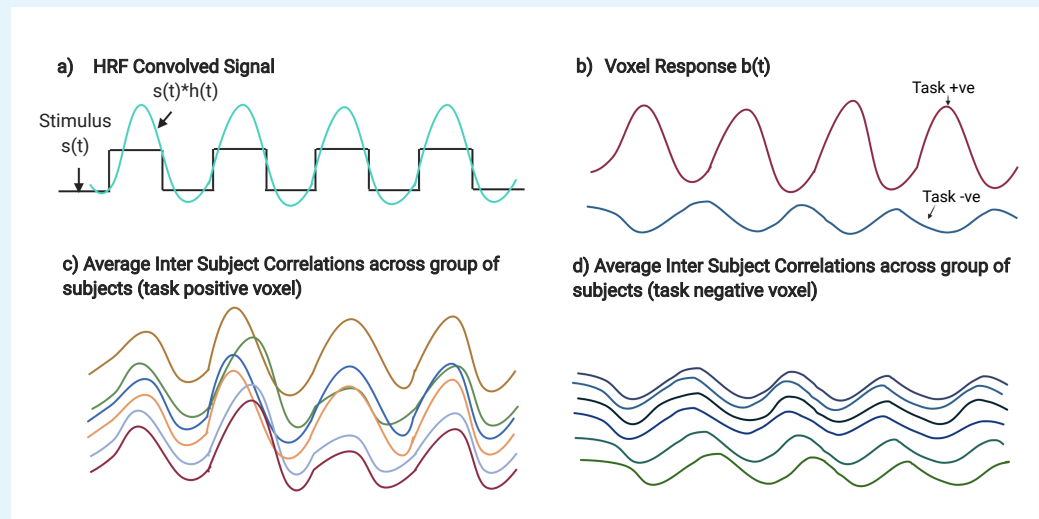

136

137

138

139

**Box 1 Figure 1.** ISC: a) ISC method applied to block based task paradigms. b) Voxel responses for task positive and negative region differ and result in different ISC values across subjects in c) and d).

140

141

142

143

144

145

146

147

148

149

150

151

152

153

154

155

156

157

158

159

160

161

162

163

164

165

166

167

168

169

170

171

The Inter-subject Correlation (ISC) method is a promising approach for statistical analysis of fMRI data (*Hasson, 2004*). Although it has been claimed that ISC may be used to find brain activations in the conventional block-based or event-based (or mixed) task paradigms (*Kauppi, 2010*), with good concordance to the General Linear Model (GLM) analysis results, the unique value of the ISC method comes from its unique ability to find brain activations in naturalistic paradigms such as watching a movie inside the fMRI scanner (*Hasson et al., 2009*), listening to audio stories (*Chen et al., 2016*) or other similar paradigms (*Simony et al., 2016*). The conventional GLM analysis method, which requires an explicit definition of different task conditions, is too restrictive in such paradigms as compared to the ISC method where no such definitions are needed.

In the experimental paradigms suitable for the ISC analysis, all the subjects are given exactly the same stimulus in the fMRI scanner. The BOLD time series of a voxel is then correlated with the BOLD time series of the corresponding voxels of all the other subjects. Statistical techniques such as bootstrapping (*Kauppi, 2010*) are used to find voxels with significant positive correlations with the corresponding voxels of other subjects.

A significant Inter Subject Correlation in a voxel's BOLD time series indicates that the corresponding voxels of the subjects are responding in a similar manner to different experimental conditions i.e., they must be getting activated and de-activated together. Since the subjects are scanned independently and they only share the identical experimental conditions, it may be concluded that the simultaneous activations and de-activations of the voxels of different subjects must be in response to the different experimental conditions presented during the experiment. The ISC method has been very successful in finding brain activity under different types of naturalistic experimental paradigms as it does not require an explicit definition of different experimental conditions.

When the ISC method is applied to a task-based paradigm with identical stimulus timings across the subjects, it is also expected to find significant inter-subject correlations among the task-negative voxels of the default mode network (DMN). At the presentation of an externally-oriented, attention-demanding stimulus, the BOLD response of a DMN voxel of all the subjects is expected to reduce (and is expected to increase when the stimulus is removed) thereby causing a significant inter-subject correlation among them (see Fig. 1(d)). We however find that this is not the case. The lack of synchronization in the DMN deactivations leads to low ISC of voxels in the DMN.

**Table 1.** Overlap between ISC and GLM. M1,M2,M3 and M4 are measures defined in Methods section. TP - Number of Task Positive voxels, TN - Number of Task Negative voxels, ISC - Number of activated ISC voxels

| Brain Area           | <i>Dataset</i> | <b>M1</b> | <b>M2</b> | <b>M3</b> | <b>DICE</b> | <b>TP</b> | <b>TN</b> | <b>ISC</b> |
|----------------------|----------------|-----------|-----------|-----------|-------------|-----------|-----------|------------|
| <b>Whole Brain</b>   | <i>FNF</i>     | 0         | 0.078     | 1         | 0.083       | 69104     | 59885     | 5416       |
|                      | <i>AV</i>      | 0         | 0.071     | 0.98      | 0.058       | 37335     | 53988     | 2714       |
|                      | <i>BW</i>      | 0.333     | 0.435     | 0.912     | 0.821       | 132013    | 11174     | 67136      |
| <b>V1</b>            | <i>FNF</i>     | 0         | 0.331     | 1         | 0.344       | 5322      | 4910      | 1764       |
|                      | <i>AV</i>      | 0         | 0.235     | 0.979     | 0.333       | 3270      | 1328      | 786        |
|                      | <i>BW</i>      | 0         | 0.629     | 0.903     | 1.169       | 10274     | 100       | 7167       |
| <b>V2</b>            | <i>FNF</i>     | 0         | 0.372     | 1         | 0.375       | 6626      | 6521      | 2468       |
|                      | <i>AV</i>      | 0         | 0.223     | 0.981     | 0.325       | 4705      | 1742      | 1072       |
|                      | <i>BW</i>      | 0         | 0.617     | 0.918     | 1.145       | 12358     | 297       | 8304       |
| <b>Auditory</b>      | <i>FNF</i>     | 0         | 0         | 0         | 0           | 56        | 1166      | 0          |
|                      | <i>AV</i>      | 0         | 0.197     | 1         | 0.391       | 1364      | 11        | 269        |
|                      | <i>BW</i>      | 1         | 0.424     | 0.543     | 0.627       | 1206      | 2         | 945        |
| <b>Precuneus</b>     | <i>FNF</i>     | 0         | 0         | 0         | 0           | 2094      | 11491     | 0          |
|                      | <i>AV</i>      | 0         | 0         | 0         | 0           | 1725      | 4887      | 0          |
|                      | <i>BW</i>      | 0.358     | 0.323     | 0.710     | 0.590       | 5741      | 3006      | 4135       |
| <b>PCC</b>           | <i>FNF</i>     | 0         | 0         | 0         | 0           | 30        | 3677      | 0          |
|                      | <i>AV</i>      | 0         | 0         | 0         | 0           | 200       | 2166      | 0          |
|                      | <i>BW</i>      | 0.528     | 0.299     | 0.674     | 0.745       | 852       | 1799      | 1786       |
| <b>Hippocampus</b>   | <i>FNF</i>     | 0         | 0         | 0         | 0           | 2258      | 191       | 0          |
|                      | <i>AV</i>      | 0         | 0         | 0         | 0           | 423       | 254       | 0          |
|                      | <i>BW</i>      | 0         | 0.071     | 0.967     | 0.142       | 2463      | 0         | 182        |
| <b>Paracingulate</b> | <i>FNF</i>     | 0         | 0         | 0         | 0           | 903       | 5309      | 0          |
|                      | <i>AV</i>      | 0         | 0         | 0         | 0           | 158       | 5075      | 0          |
|                      | <i>BW</i>      | 0.680     | 0.474     | 0.959     | 1.077       | 4427      | 2649      | 4068       |

180 may be followed by a subsequent increase in the signal for some subjects (and/or trials) while  
 181 maintaining a average negative signal change for the duration of the task block. Thus, the GLM  
 182 analysis which considers the data for all the blocks and all the time-points within these blocks  
 183 together to estimate the parameter value (beta value) which is then tested for significance, does  
 184 not consider the dynamics of the BOLD signal within the block. Thus, if a voxel's BOLD response  
 185 shows a 1% increase followed by a 2% decrease of the same duration, it is likely to be classified  
 186 as a task negative voxel that gets deactivated in response to the experimental condition by the  
 187 conventional GLM analysis.

188 It turns out that the deactivations in the default mode network regions, are not strongly locked  
 189 to the stimulus and are also not strongly synchronized across the trials or the subjects. Fig. 3 shows  
 190 the average percent signal change with respect to the trial onset for the FNF dataset. Here, we  
 191 reorganized the data into corresponding trial blocks and plotted the percent BOLD signal change  
 192 from the block onset and averaged it across trials. The top row shows the data for a single subject  
 193 and the bottom row shows the data for the average of subjects. As we can clearly see from panels  
 194 in the first two columns that the trial-average and subject-trial-average deactivations in the default  
 195 mode network regions have a very low percentage change ( $M=0.15\%$  as compared to 1%). This  
 196 is due to the fact that deactivations in different trials and different subjects occur at different  
 197 times and averaging this across trials or subjects cancels the effect out leading to an overall lower  
 198 magnitude of percentage signal change (and also lower inter-subject correlations). The amount of  
 199 synchronization in task positive regions is considerably higher as is evident from the task positive  
 200 panels in Fig. 3.

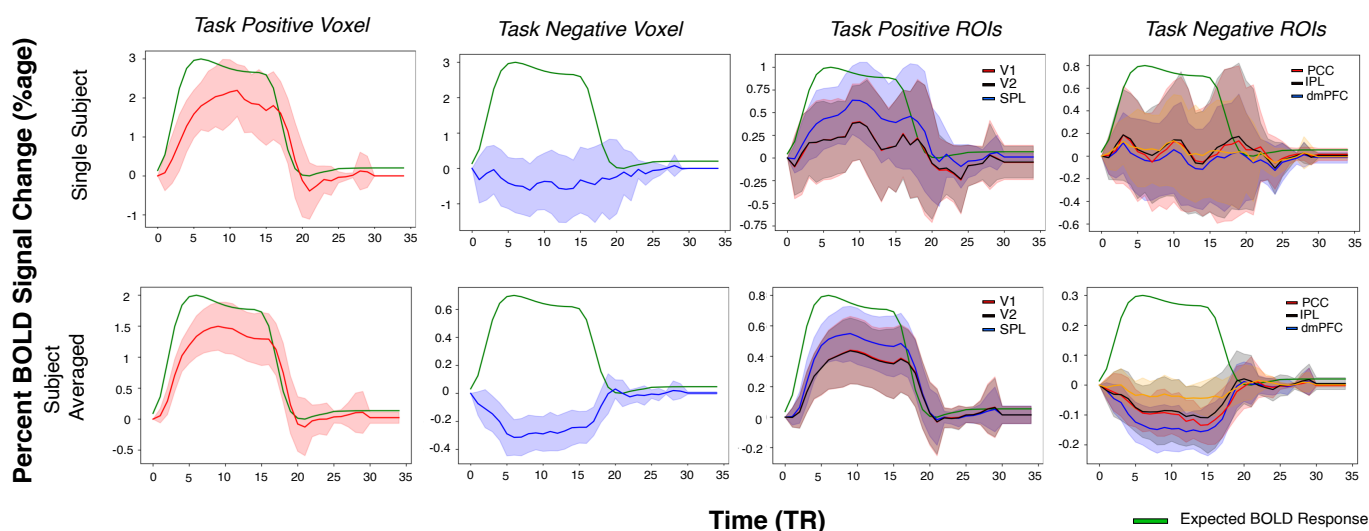

**Figure 3.** Percent BOLD signal change with respect to time of trial onset, averaged across all the blocks in the task. Top row refers data from single subject, averaged across the blocks, and bottom row refers to subjects averaged data. First column represents data for max zstat voxel (55,16,34) and second column for min zstat voxel (41,27,47). The averaged signal change for task positive :V1,V2, Superior Parietal Lobule and task negative: Inferior Parietal Lobule , dorsal medial prefrontal cortex and Posterior Cingulate Cortex ROIs are shown in third and fourth columns respectively. The task positive and negative ROIs were derived from the Schaefer atlas (Schaefer et al., 2018). Green curve depicts the expected BOLD responses within a block.

201 In order to characterize the synchronization, we developed two approaches called Inter Trial  
 202 Temporal Synchronization Analysis (IT-TSA) and Inter Subject Temporal Synchronization Analysis  
 203 (IS-TSA) which respectively measures the significance in synchronized BOLD signal change across  
 204 trials or subjects respectively at each time instant (see Methods for details). Fig. 4 is laid out similar  
 205 to Fig. 3 and depicts how the IT-TSA zstat value varies with time within a trial interval for an individual

206 task positive and task negative voxel (left two columns) and for default mode network and task  
 207 positive ROIs (right two columns). For the most task positive voxel, the absolute IT-TSA zstat at mid  
 208 of block (M=8.78, SD=3.67) significantly differs [t(29)=10.06,  $p < 0.0001$ , Cohen's  $d = 2.45$ ] with the  
 209 most task negative voxel (M=-2.03, SD=1.15) implying much weaker inter-trial synchronization in  
 210 the default mode network regions. The subject averaged absolute IT-TSA value at mid of block for  
 211 task positive ROIs V1 [M=4.65, SD=2.44], V2 [M=5.21, SD=1.76], and Superior Parietal Lobule [0.90,  
 212 SD=0.7] was higher than default mode network ROIs Posterior Cingulate Cortex (M=1.31, SD=0.26),  
 213 Inferior Parietal Lobule (M=1.36, SD=0.22), and dorsal medial prefrontal cortex (M=0.98, SD=0.14).

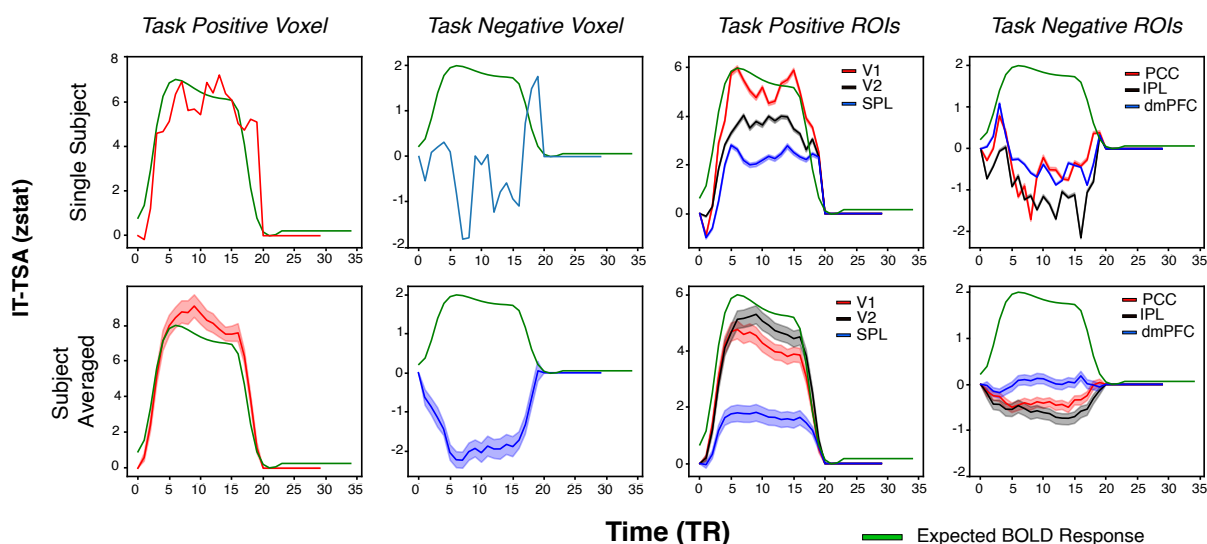

**Figure 4.** We plotted the Inter Trial Temporal Synchronization Analysis parameter for a single subject and averaged subjects for the FNF dataset. Top row refers to a single subject and bottom row to averaged subjects. First column is for data from voxel (55,16,34) with max zstat (red), second column is for data from voxel (41,27,47) with minimum zstat value (blue). Third column plots the task positive ROIs: V1, V2 and Superior Parietal Lobule. The fourth columns plots the task negative ROIs: Posterior Cingulate Cortex, Inferior Parietal Lobule and dorsal medial Prefrontal Cortex. Green curve depicts the ideal BOLD response.

214 We performed an independent t-test to determine the difference between the IT-TSA zstat  
 215 values for the default mode network and task positive regions. Fig. 5(a) shows the ROI averaged  
 216 IT-TSA values for three task positive (V1,V2,SPL) (combined mean=3.34, SD=2.61) and three default  
 217 mode network regions (PCC, IPL, dIPFC) (combined mean=1.19, SD=0.27). The task positive regions  
 218 were more synchronized across trials [t(10641)=64.86,  $p < 0.0001$ , Cohen's  $d = 1.15$ ]. Fig. 5(b) shows  
 219 the plot of ROI averaged IT-TSA values versus GLM Z-statistic. The task positive regions (averaged  
 220 GLM  $zstat > 2$ ) shows higher synchronization than default mode network regions similar to other  
 221 non task positive regions ( $zstat < 2$ ). We fit a simple linear regression to predict IT TSA values based  
 222 on the GLM zstat values separately for task positive and non task positive including default mode  
 223 network. For the task positive regions, significant regression was found [F(1,22)=97.09,  $p < 0.0001$ ,  
 224  $R^2 = 0.815$ ; IT-TSA =  $-2.01 + 1.04 * \text{GLM}$ ]. IT TSA value increased by 1.04 for every unit increase in the  
 225 GLM zstat for task positive regions. For the non task positive regions also the regression fit was  
 226 significant [F(1,74)=452.6,  $p < 0.0001$ .  $R^2 = 0.859$ ; IT-TSA =  $0.021 + 0.167 * \text{GLM}$ ]. IT TSA value decreased  
 227 by 0.167 units for every decrease in one unit of GLM zstat value for non negative and default  
 228 mode regions. Fitting the linear regression on only the task negative regions, we found significant  
 229 fit [F(1,29)=63.62,  $p < 0.0001$ ,  $R^2 = 0.687$ ; IT-TSA =  $0.19 + 0.224 * \text{GLM}$ ]; every unit decrease in GLM zstat  
 230 decreased the IT TSA by 0.224 units.

231 In order to determine synchronization across subjects, we plotted the IS-TSA in Fig. 6 for the



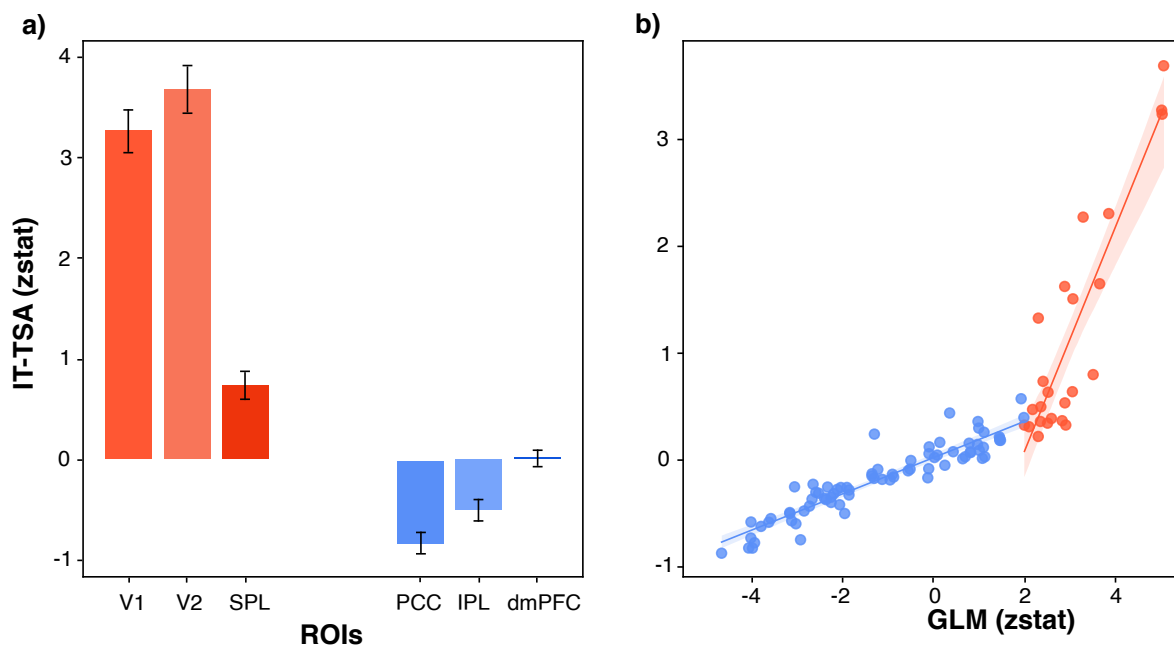

**Figure 5.** Analysis of the IT-TSA values across ROIs from the Schaefer atlas in the FNF task. Left panel represents bar plot for task positive and non task positive ROIs. The max IT-TSA from each averaged signal across subjects for each voxel was computed. Bar plot represents the meaned IT-TSA across voxels in the corresponding ROI and the standard deviation. The right panel indicates scatter plot between the ROI averaged zstat value v/s ROI averaged IT-TSA value.

232 FNF dataset and in Fig. 7 for the AV dataset. The most significant task positive voxel in the FNF  
 233 dataset had higher absolute IS-TSA ( $M=7.32$ ,  $SD=4.78$ ) as compared to the most task negative voxel  
 234 ( $M=1.7$ ,  $SD=1.33$ ). For the task positive ROIs, the IS-TSA values at middle of a task block for V1  
 235 ( $M=4.93$ ,  $SD=2.81$ ), V2 ( $M=5.50$ ,  $SD=2.34$ ), SPL ( $M=0.73$ ,  $SD=1.43$ ) are collectively significantly higher  
 236 [ $t(10641)=49.55$ ,  $p<0.00001$ , Cohen's  $d=0.89$ ] than the absolute IS-TSA values at middle of block for  
 237 the task negative ROIs - PCC ( $M=2.3$ ,  $SD=1.43$ ), IPL ( $M=1.44$ ,  $SD=0.84$ ) and dmPFC ( $M=0.79$ ,  $SD=0.54$ ).  
 238 Similarly for the AV data set the IS-TSA values for task positive ROIs V1 ( $M=3.00$ ,  $SD=1.45$ ), V2  
 239 ( $M=3.47$ ,  $SD=1.79$ ), SPL ( $M=1.42$ ,  $SD=1.06$ ) is significantly higher [ $t(9000)=6.25$ ,  $p<0.0001$ , Cohen's  
 240  $d=1.205$ ] as compared to absolute IS-TSA values middle of block for default mode regions PCC  
 241 ( $M=0.91$ ,  $SD=0.68$ ), IPL ( $M=0.99$ ,  $SD=0.70$ ), and dmPFC ( $M=0.82$ ,  $SD=0.61$ ). These results clearly  
 242 establish that although the default mode network regions do show a BOLD signal decrease during  
 243 the trial presentation, this signal decrease is weakly synchronized across trials and across subjects.  
 244 We then compared the ROI averaged IS-TSA zstat value against the GLM zstat value for the  
 245 three tasks in Fig 8(a). The task positive regions (GLM averaged zstat > 0) show higher IS-TSA  
 246 values as compared to non task positive regions and default mode regions. We found a significant  
 247 regression [ $F(1,47)=98.33$ ,  $p<0.0001$ ,  $R^2=0.677$ ;  $IS-TSA=-0.75+0.82*GLM$ ] for the task positive regions,  
 248 and the IS TSA zstat value increased by 0.82 for every unit increase in the GLM zstat. For the non  
 249 task positive regions also the regression fit was significant [ $F(1,49)=63.56$ ,  $p<0.0001$ ,  $R^2=0.56$ ;  
 250  $IS-TSA=-0.11+0.41*GLM$ ]. IS TSA value decreased by 0.41 units for every decrease in one unit of  
 251 GLM zstat value for non negative and default mode regions. From the plot in Fig 8(a), we see that  
 252 the default mode regions have lower IS-TSA values. We fit a linear regression model and found  
 253 significant regression for task positive regions [ $F(1,49)=94.08$ ,  $R^2=0.658$ ;  $IS-TSA=0.30+0.742*GLM$ ]  
 254 and for task positive regions [ $F(1,47)=62.17$ ,  $p<0.0001$ ,  $R^2=0.569$ ,  $IS-TSA=0.43+0.46*GLM$ ] which  
 255 signifies that for every unit increase in GLM zstat, task positive regions IS-TSA increased by 0.78

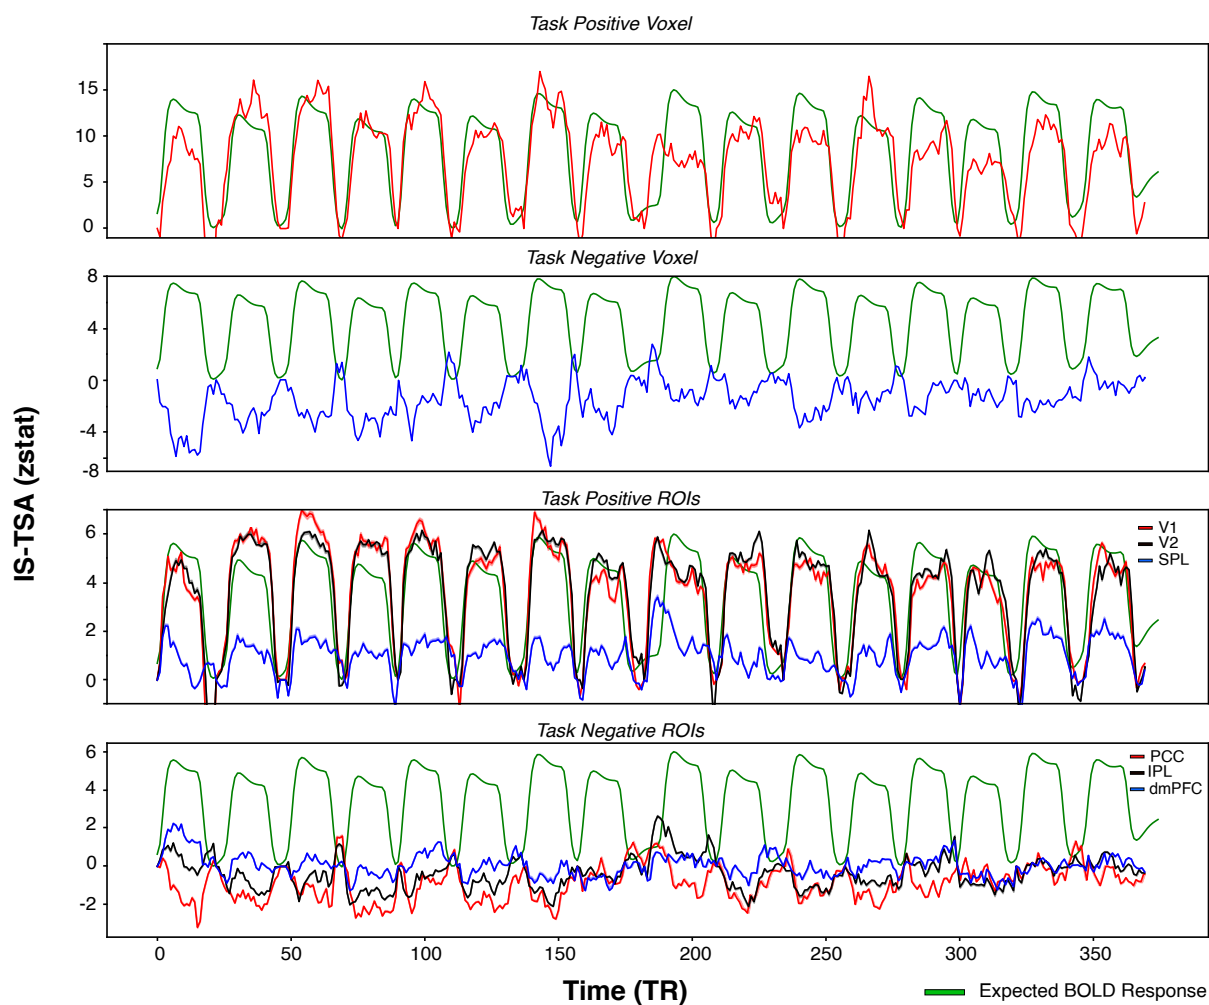

**Figure 6.** IS-TSA values across time for FNF dataset. Top panel depicts IS-TSA for a voxel with maximum GLM zstat value, second panel with the minimum GLM zstat value. The bottom two panel shows the averaged IS-TSA across voxels for task positive ROIs: V1, V2, SPL and default mode network ROIs (PCC, IPL, dmPFC). Green curve depicts the ideal BOLD response.

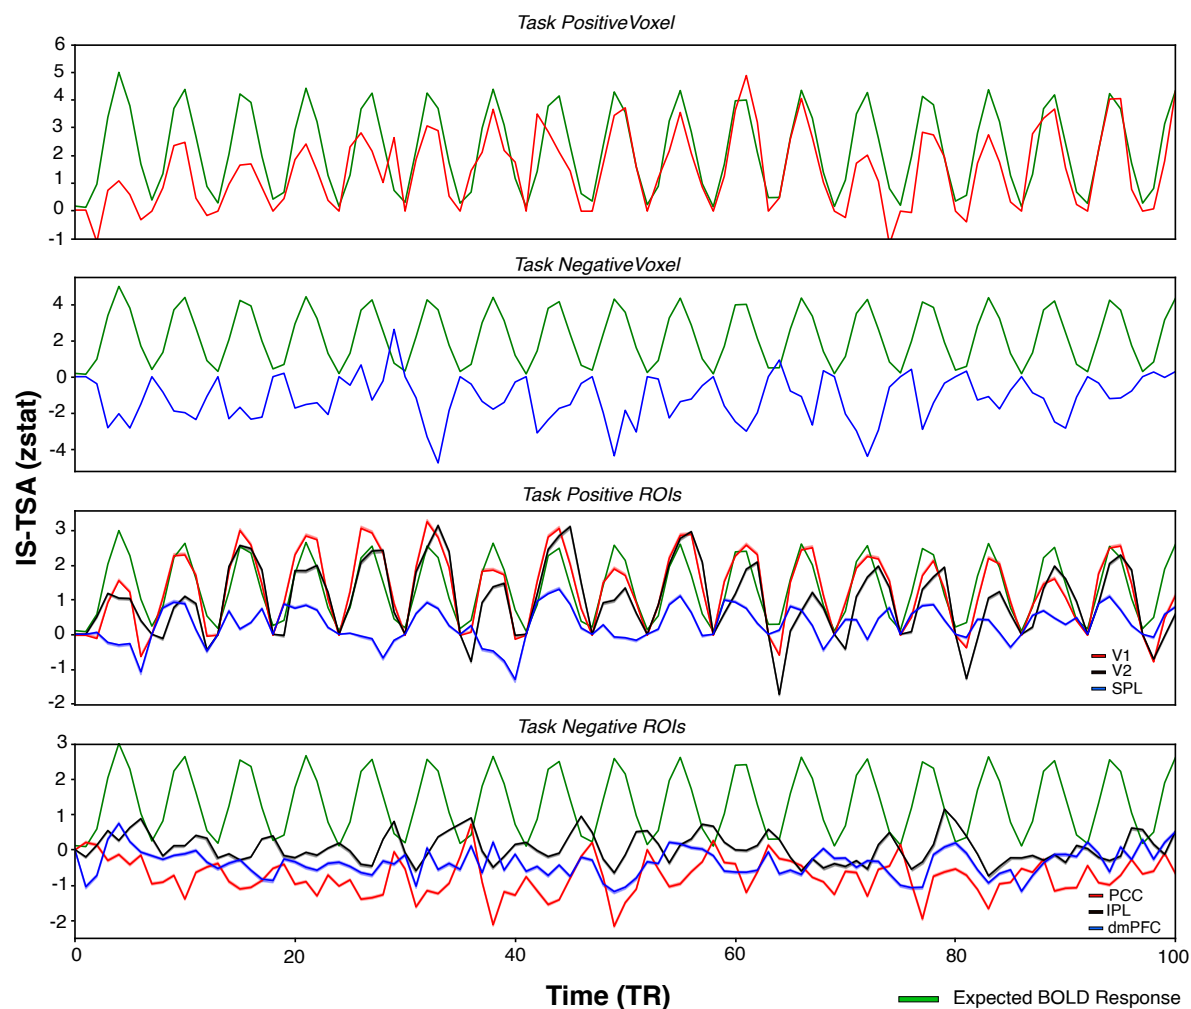

**Figure 7.** IS-TSA values across time for AV dataset. Top panel depicts IS-TSA for a voxel with maximum Z statistic value, second panel with the minimum Z statistic value. The bottom two panel shows the averaged IS-TSA across voxels for task positive ROIs (V1, V2, SPL) and default mode network ROIs (PCC, IPL, PFC). Green curve depicts the ideal BOLD response.

256 units but only 0.46 units for task negative regions. For the BW dataset from the plot in Fig 8(a),  
257 the linear fit between the IS-TSA and GLM values for task positive regions [ $F(1,82)=53.10, p<0.0001,$   
258  $R^2=0.393$ ; IS-TSA= $0.22+0.50*GLM$ ] and task negative regions [ $F(1,13)=5.196, p<0.05, R^2=0.286$ ; IS-  
259 TSA= $1.06+0.58*GLM$ ] was significant but there was no difference in the slopes of the regression  
260 parameters although the IS-TSA values was higher for task positive regions [ $t(7879)=26.51, p<0.00001,$   
261 Cohen's  $d = 0.03$ ], the effect size was negligible.

262 In order to calculate the efficacy of the IS-TSA metric, we plotted the stimulus signal correlated  
263 with the IS-TSA for each voxel which was then averaged over the ROIs from Schaefer atlas (*Schaefer*  
264 *et al., 2018*) and plotted for the three datasets in Fig 8(b). The scatter plots were fit to a linear  
265 regression model separately for task positive and default mode network regions for the three  
266 datasets. The statistics for the linear regressions [ $F(1,47) = 286.2, R^2=0.859$ ; IS-TSA= $-0.06+0.138*GLM$   
267 for task positive;  $F(1,48) = 373.2, R^2=0.886$ ; IS-TSA= $-0.005+0.08*GLM$  for task negative regions] for  
268 the FNF dataset show that stimulus correlation with the IS-TSA increases more by 0.06 per unit  
269 change in GLM zstat, similarly [ $F(1,48) = 570.0, R^2=0.922$ ; IS-TSA= $-0.02+0.179*GLM$  - task positive;  
270  $F(1,47) = 529.9, R^2=0.919$ ; IS-TSA= $0.02+0.081*GLM$  - task negative] by 0.1 for AV dataset and 0.02  
271 [ $F(1,82) = 243.7, R^2=0.748$ ; IS-TSA= $-0.02+0.102*GLM$  - task positive;  $F(1,13) = 27.32, R^2=0.678$ ; IS-  
272 TSA= $0.005+0.086*GLM$  - task negative] for BW dataset, indicating IS-TSA values are less synchronized  
273 and relatively weaker for the default mode network as compared to the task positive regions.

## 274 Discussion

275 In this paper, we analyzed the synchronization of stimulus locked deactivations in the default mode  
276 network (DMN) and found that the task induced deactivations in DMN regions have a weaker  
277 synchronization across trials and subjects as compared to synchronization in stimulus-locked  
278 activations in task-positive regions. This effect is consistent in three vastly different tasks involving  
279 varied regions of the brain. There may be two plausible explanations for this observed phenomenon:  
280 *Physiological or Neural.*

281 **Physiological explanation:** The fMRI BOLD signal measures the changes in the blood oxygenation  
282 level (which is related to the cerebral blood flow, CBF), which is indirectly related to the neural  
283 activity through an empirically observed *hemodynamic response function* (HRF) (see Box 2). The  
284 exact mechanism of this neurovascular coupling is still not very well understood and is a topic of  
285 active research (*Logothetis and Wandell, 2004; Logothetis, 2008; Mathias et al., 2018*). Many early  
286 studies on the HRF have reported (though slightly inaccurately – see (Box 2) a significant variability  
287 in the HRF across voxels (*Miezin et al., 2000; Aguirre et al., 1998*) and regions of interest (ROIs)  
288 (*De Zwart et al., 2005; Saad et al., 2001*), subjects (*Handwerker et al., 2004*), trials (*Greicius and*  
289 *Menon, 2004*) and experiments (*Dale and Buckner, 1997*). The lack of inter-trial, inter-subject and  
290 inter-voxel synchronization in DMN deactivations may be attributed to the corresponding variability  
291 in the HRFs. The possible reasons of the (incorrectly) observed variability in the HRF as discussed  
292 in the literature are differences in vasculature (*De Zwart et al., 2005*), duration of stimulus (*Dale*  
293 *and Buckner, 1997; Birn et al., 2001; Soltysik et al., 2004; Mathias et al., 2018*), presentation rate  
294 (*Miezin et al., 2000*), laminar differences (*Bandettini, 2012; Goense et al., 2012; Heinzle et al., 2016*),  
295 ventricle size, density, and vessel elasticity (*Handwerker et al., 2012*). However, the above reasons  
296 do not sufficiently explain why weaker synchronization is observed only in the DMN regions, not in  
297 most of the task positive regions.

298 **Neural explanation:** The observed BOLD signal is the convolution of the HRF and the neural  
299 signal (see Box 1). The weaker synchronization of the BOLD signal in the DMN regions may be  
300 due to the weaker synchronization in the corresponding neural signal (or neural activity). For  
301 this explanation, one needs to first examine the functions of DMN which is still an active area of  
302 research (*Buckner and DiNicola, 2019; Christoff et al., 2016; Nathan Spreng, 2012*). Presently two  
303 predominant hypotheses (namely, the *Sentinel Hypothesis* and the *Internal Mentation Hypothesis*  
304 (*Buckner et al., 2008*) have been proposed to explain the observed task-induced deactivations

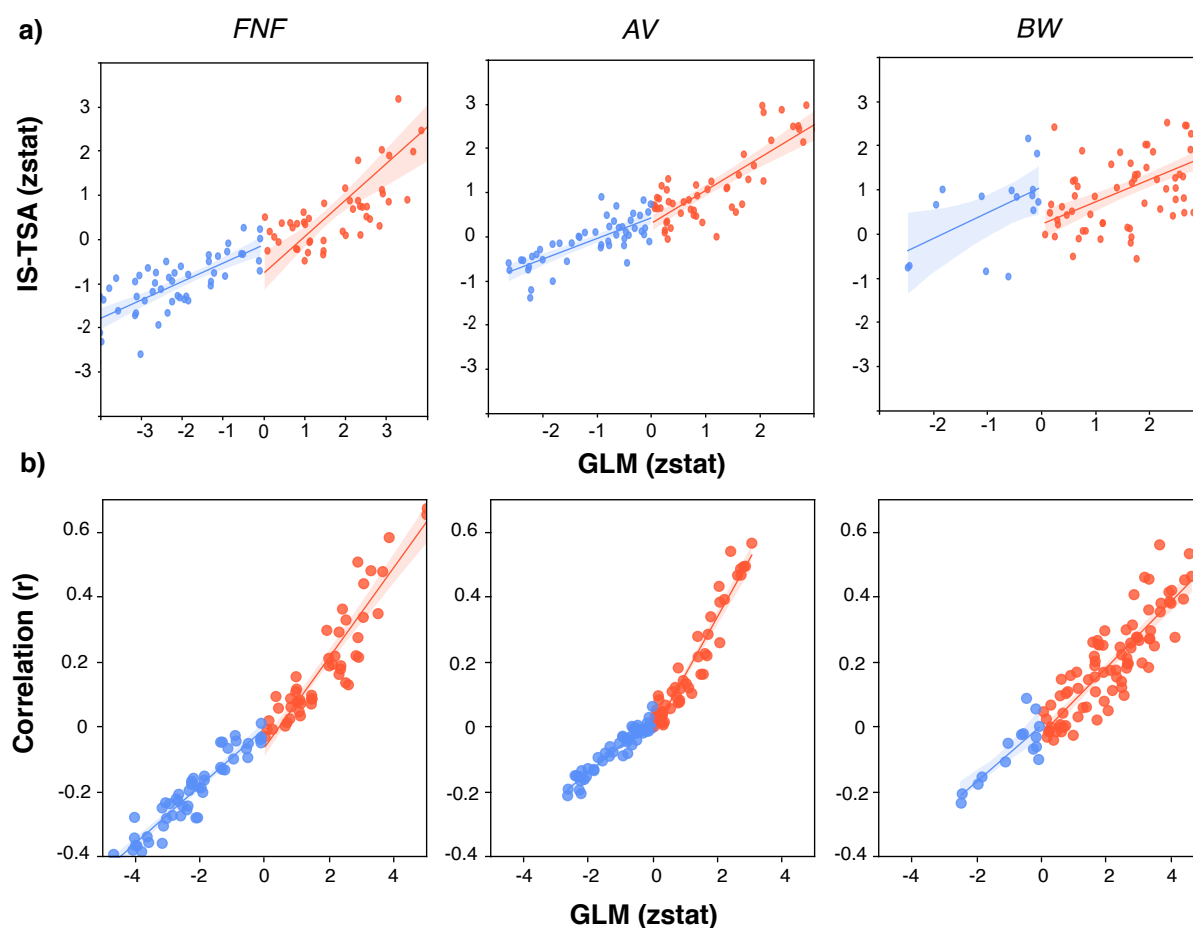

**Figure 8.** A) IS-TSA value averaged across ROIs from the 100 parcel Schaefer atlas plotted against the ROI averaged GLM zstat values indicating a stronger slope for the task positive regions than the task negative regions. B) The IS-TSA value per voxel was computed for the three datasets and correlated with the HRF convolved stimulus signal across time. The correlation was then averaged across all the voxels in the ROI from the Schaefer atlas and plotted with the ROI averaged Z statistic value. IS-TSA values are correlated strongly with the stimulus for task positive regions than default mode network regions for AV and FNF dataset. The effect is less significant for the BW dataset.



305 in the DMN regions, both of which can very well explain the observed weaker stimulus-locked  
306 synchronization in the DMN regions.

307 According to the sentinel hypothesis, the DMN plays a role in monitoring the external environment  
308 (*Gusnard and Raichle, 2001; Shulman et al., 1997*) and when presented with an active task requiring  
309 focused attention, the brain directs its inner resources to attending the task, while temporarily  
310 suspending the environment monitoring. The "default network is hypothesized to support a broad  
311 low-level focus of attention when one – like a sentinel – monitors the external world for unexpected  
312 events" (*Shulman et al., 1997; Gilbert and Wilson, 2007*). If the sentinel hypothesis is true, it may be  
313 argued that different trials and different subjects take different amounts of time to disengage from  
314 the external monitoring and start attending to the presented task thereby leading to the weaker  
315 task-locked synchronization in the neural signal.

316 According to the internal mentation hypothesis, the DMN directly contributes to internal men-  
317 tation such as self-reflective thoughts and judgements (*Jessica R. Andrews-Hanna, 2012; Tripathi*  
318 *and Bharadwaj, 2021*). Imaginative constructions of hypothetical events or scenarios (*Schacter*  
319 *et al., 2007*), autobiographical recall (*Spreng et al., 2009*), theory of mind related activity (*Saxe and*  
320 *Kanwisher, 2003*). When presented with an attention demanding task, the internal mentation  
321 is temporarily suspended to attend to the task. Under this hypothesis also, different trials and  
322 subjects may take different amounts of time to *disengage* from their internal mentation and attend  
323 to the task at hand thereby leading to variability in the neural signal of the DMN. As a result, the  
324 observed BOLD signal is expected to have weaker synchronization as compared to the task-positive  
325 regions, especially those involving the early sensory processing.

359 In addition, there is more evidence favouring the neural hypothesis for explaining the weaker  
360 synchronization in the DMN regions. There are studies that demonstrate the dynamic reconfigu-  
361 ration of the DMN regions that clearly indicating that the neural activity in different DMN regions  
362 may not always be positively correlated and the activity of some DMN regions may not always be  
363 negatively correlated with task positive regions. There are also studies that report changes in the  
364 function of DMN with different disease conditions.

365 *Interdigitated Networks*: Recent work by Braga and colleagues (*Braga and Buckner, 2017; Braga*  
366 *et al., 2019*) have shown that DMN regions are interspersed and juxtaposed networks which are  
367 hard to parse out in group averaged results and may slightly vary across subjects which would  
368 effect any technique performing group level analyses.

369 *Dynamic Reconfiguration of DMN*: Though Default Mode Network deactivations are related to task  
370 difficulty (*Mckiernan et al., 2003*), engagement and the activity in sensory cortices is related to  
371 signal suppression in the DMN (*Greicius and Menon, 2004*) but recent evidence have found that  
372 DMN may dynamically reconfigure with the task. A study looked at the simultaneous EEG-fMRI data  
373 in a visual oddball paradigm and found transient engagement in both task-dependent and default  
374 mode networks on a millisecond timescale (*Walz et al., 2014*). Such a reconfiguration was also  
375 found in the default networks when subjects watched a movie in the fMRI scanner (*Simony et al.,*  
376 *2016*). During a decision making task, the deactivation of the DMN did not occur for all subjects  
377 and reduced deactivations were not related to impaired task performance (*McCormick and Telzer,*  
378 *2018*). In a gradual onset continuous performance task(gradCPT), the authors found associated  
379 role of DMN-DAN regions in maintaining attention and trial by trial variability in the activations of  
380 task positive regions and deactivations of the DMN region was related to prestimulus alpha power  
381 (*Mayhew et al., 2013*).

382 *Effect of Disorders on DMN*: Various brain disorders can affect the default mode networks. Mohan  
383 et. al.(2016) summarises the effects of Parkinson's, Alzheimer's and Attention Deficit Hyperactivity  
384 Disorder (ADHD) on the functional connectivity and how using drugs like memantine and donepezil  
385 can restore the functional connectivity in cases of Alzheimer's (*Mohan et al., 2016*). Adolescents  
386 with ADHD show higher hemodynamic response variability possibly due to neural fluctuations  
387 in the anterior regions of DMN as compared to healthy controls (*Soares et al., 2017*) which is  
388 associated with reduced task performance (*Mowinckel et al., 2017*). Patients with ADHD are unable

327

## Box 2. BOLD Variability

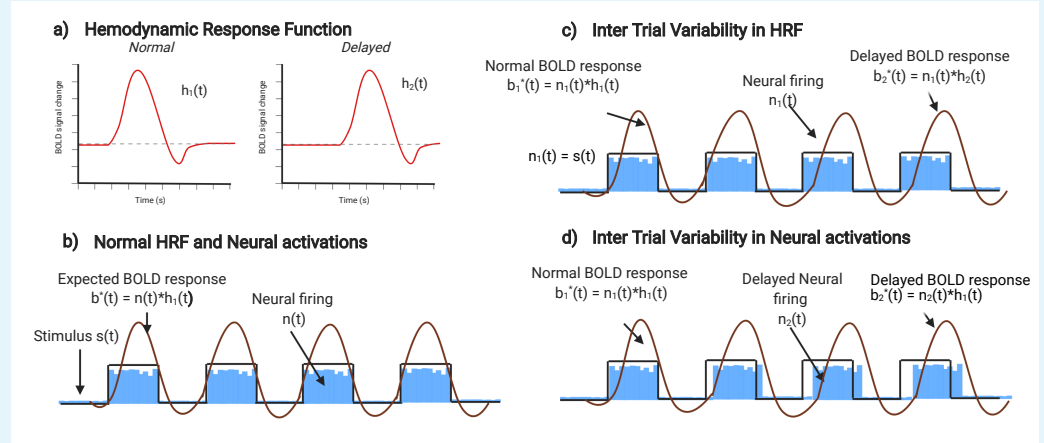

328

329

330 **Box 2 Figure 1.** We look at the BOLD signal variability caused by delayed HRF or delayed neural firing. a) Normal and delayed HRF. b) Normal HRF and neural signals result in a stimulus locked expected BOLD response. c) Delay in HRF within trials can result in delayed BOLD response in later trials. d) The same BOLD response can be detected if the neural firing gets delayed as trials progresses.

331

332

333

General Linear Model:

334 
$$b^*(t) = n(t) * h(t) \tag{1}$$

335 
$$b(t) = \beta b^*(t) + \epsilon(t) \tag{2}$$

336 
$$n(t) = s(t) \tag{3}$$

337

- 338
- 339
- 340
- 341
- 342
- 343
- $b(t)$ : The observed BOLD signal
  - $b^*(t)$ : Expected BOLD response
  - $h(t)$ : The hemodynamic response function (HRF)
  - $n(t)$ : The neural signal (representing the neural activity)
  - $s(t)$ : The activating stimulus
  - $\epsilon(t)$ : Noise

344

345

346

347

348

349

350

351

352

353

354

The observed BOLD signal of a voxel in the area of activity has been empirically observed to be delayed and seems to have gone through a low pass filtering (see Fig. 2(a)). Most of the fMRI analysis models it as a linear-time invariant (LTI) system and the corresponding transfer function mapping the experimental condition to the ideal BOLD response is called the hemodynamic response function (HRF). Another implicit (and potentially incorrect) assumption made in most of the fMRI modeling literature, especially those which study the variability in the HRF (such as (Dale and Buckner, 1997; Lewis et al., 2018; Handwerker et al., 2004; Birn et al., 2001; Aguirre et al., 1998)) is that the neural response  $n(t)$  is identical to the experimental stimulus  $s(t)$ . While this may be a reasonable assumption to make for early sensory processing regions, it may not be true for regions having more complex and nuanced functions such as the default mode networks.

355

356

357

358

Fig. 2(c), shows that how the observed inter-trial variability in the BOLD signal may arise due to the variability in the HRF. Fig. 2(d) demonstrates that the observed inter-trial variability in the BOLD signal may be due to the variability in the neural activity. In practice, the observed variability may be a combination of both these factors.

389 to suppress their DMN (*Fassbender et al., 2009*) which may have dysfunctional interactions with  
390 the executive control network (*Bozhilova et al., 2018*). A study found that the synchronization  
391 between task positive network and DMN fails in case of ADHD and when restored using the drug  
392 methylphenidate improved task performance (*Querne et al., 2017*).

393 If the neural hypothesis is correct, a suitably developed inter-trial synchronization metric may  
394 denote the agility of the individual in *disengaging* from the internal mentation or environment  
395 monitoring to quickly focus on the task at hand. Such a metric should be correlated to cognitive  
396 measures of attention. If found true, this may further lead to development of fMRI-based measures  
397 of mind wandering, concentration or attention.

## 398 **Conclusions**

399 We studied the DMN synchronization within trials and across subjects on a stimulus locked task  
400 using a new method called Temporal Synchrononization Analysis and found that default networks  
401 have low synchronization as compared to task positive networks. Our study adds to current  
402 literature that the DMN should not be considered only as a task negative network. The inter trial  
403 variations in synchronization may have neural origins as compared to HRF or structural variations  
404 which would be more evident in the DMN. General Linear Model based analysis fail to capture such  
405 effects and the field should be using other statistical approaches to analyze task fMRI datasets. A  
406 method to quantify synchronization can also help measure attentional differences across healthy  
407 subjects and even populations with ADHD or Autism.

## 408 **Methods**

409 In order to compare the synchronization across subjects, three publicly available datasets related  
410 to different cognitive modalities were used which had the same stimulus onset times across the  
411 subjects.

### 412 **Dataset**

413 Datasets Used:

- 414 • **Food vs Non Food (FNF):** Photos of food and non food items were shown to 30 subjects to  
415 test craving for food items. Each run had 16 blocks with 30 second block length and TR of 1.6  
416 seconds (*Smeets et al., 2013*).
- 417 • **Affective Videos (AV):** Eleven subjects were shown audiovisual stimuli of various emotional  
418 valences. Each block had 5 seconds of the stimulus with 7 seconds of fixation. TR was 2.2  
419 seconds (*Kim et al., 2016*).
- 420 • **Bilingual words (BW):** Cross Language repetition priming was tested on 13 bilingual subjects  
421 (*Poldrack et al., 2013*) who were shown words of various levels of difficulty in Spanish and  
422 English, and they had to rate whether they know it or not. It was a trial based task with 1.5  
423 second of stimulus with around 1-6 seconds of fixation and TR of 2 seconds.

424 Study details, participants and MRI acquisition can be referred to individual papers (*Smeets*  
425 *et al., 2013; Kim et al., 2016; Poldrack et al., 2013*)

### 426 **Preprocessing**

427 We used FSL for preprocessing (*Jenkinson et al., 2012*). The brain was extracted from the high reso-  
428 lution structural file (1mm isotropic) using a repeated version of the FSL-BET. Slice-time correction,  
429 motion correction, temporal high-pass filtering (100s), spatial smoothing with 6mm FWHM was  
430 done on all datasets. This was followed by co-registration across the dataset and normalization  
431 with an MNI 2mm template.

## 432 **GLM analysis**

433 FSL Subject level analysis were done on the subject according to the given task condition. We limited  
434 ourselves to first run from the AV dataset and BW dataset and all runs from FNF followed by higher  
435 level analysis on the datasets individually. FDR correction ( $q < 0.05$ ) was done to find corrected FDR  
436 values. The final maps were the negative logarithm of the corrected FDR values.

437 We used FSL Feat tool to analyze the data (*Jenkinson et al., 2012*), all the environment variables  
438 were taken to create the design matrix and the contrast was active against the fixation. We  
439 converted the zstat to p values which then were FDR corrected using statsmodels toolbox in Python  
440 (*Seabold and Perktold, 2010*). Negative logarithm was done on these FDR values. The sign of zstat  
441 value was multiplied to give us direction information post FDR correction.

## 442 **Overlap Metrics**

443 The metrics used in table 1 are defined here: (ISC - denotes the number of activated voxels in ISC,  
444 TP - the number of task positive voxels, TN - the number of task negative voxels)

$$M_1 = \frac{|TN \cap ISC|}{|TN|} \quad (4)$$

$$M_2 = \frac{|TP \cap ISC|}{|TP|} \quad (5)$$

$$M_3 = \frac{|ISC \cap (TP \cup TN)|}{|ISC|} \quad (6)$$

$$DICE = \frac{2 * |ISC \cap (TP \cup TN)|}{|TP \cup TN| \cup |ISC|} \quad (7)$$

## 445 **Temporal Synchronization Analysis (TSA)**

446 The Temporal Synchronization Analysis (TSA) measures the synchronization among a set of signals  
447 at different time steps. Let  $S_i(t), i \in [1 \dots N]$  be a set of  $N$  signals. The *temporal synchronization*  
448 of these signals at time  $t$  with respect to a baseline  $t_0$ , is computed by a two-sided test of hypothesis  
449 of percent signal change at time  $t$  with respect to the baseline signal at time  $t_0$ , under the null  
450 hypothesis that the percent signal changes are normally distributed with zero mean. Let  $\hat{S}_i(t) =$   
451  $(S_i(t) - S_i(t_0))/S_i(t_0) * 100$ . Under the null hypothesis, it is assumed that percent signal change  
452 with respect to the baseline,  $\hat{S}_i(t)$  has a normal distribution with zero mean and is independent  
453 for all  $i \in [1 \dots N]$ . A two-sided t-test is done, and the corresponding the p-value is converted  
454 to a standardized Z-statistic  $Z(t) = t\_to\_z(\text{mean}_i[\hat{S}_i(t)]/\text{std}_i[\hat{S}_i(t)])$  (where mean and std respectively  
455 represent the mean and standard deviations and  $t\_to\_z$  represents the function converting the  
456 t-statistic value to the corresponding z-statistic value. The temporal synchronization at time  $t$ , is  
457 given by the value of the function  $Z(t)$ .

458 A negative but significant value of temporal synchronization  $Z(t)$  at time  $t$  indicates that the  
459 signals  $S_i(t)$  for  $i \in [1 \dots N]$  synchronously decrease at time  $t$  with respect to their baseline values at  
460 time  $t_0$ . Similarly, a positive but significant value of  $Z(t)$  indicates that all the signals synchronously  
461 increase in value with respect to their respective baseline values.

462 The temporal synchronization may be computed for different trials leading to *inter-trial temporal*  
463 *synchronization (IT-TSA)*, different experimental blocks leading to *inter-block temporal synchronization*,  
464 different subjects leading to *inter-subject temporal synchronization (IS-TSA)* or *inter-voxel temporal*  
465 *synchronization (IV-TSA)*.

466 Let  $B(e, v, s, t)$  represent the BOLD signal of voxel  $v$ , subject  $s$ , after a time  $t$  of the event  $e$ . The  
467 event could be a trial of a particular type or the onset of a specific type of block. The inter-trial

468 temporal synchronization analysis (IT-TSA) for voxel  $v$  of subject  $s$  in a set of trials  $T$  is given as  
469  $Z(v, s, t)$  by computing the temporal synchronization among the signals  $B(e, v, s, t)$  for the events  
470  $e \in T$ . Similarly, the inter-subject temporal synchronization analysis (IS-TSA) for a set of subjects  
471  $U$ , with respect to a baseline event  $e$  for a voxel  $v$  is given as  $Z(e, v, t)$  by computing the temporal  
472 synchronization among the signals  $B(e, s, t, v)$  for the subjects  $s \in U$ . In a similar vein, the inter-voxel  
473 temporal synchronization analysis (IV-TSA) for a set of voxels  $V$ , with respect to a baseline event  
474  $e$ , for a given subject  $s$  is given as  $Z(e, s, t)$  by computing the temporal synchronization among the  
475 signals  $B(e, v, s, t)$  for the voxels  $v \in V$ .

476 In practice, the inter-trial temporal synchronization analysis (IT-TSA) is expected to be significant  
477 only for the voxels that get activated (or deactivated) due to the event and is expected to become  
478 insignificant (unless the subsequent trials or blocks start interfering) as soon as changes in the  
479 expected BOLD response becomes close to zero (around 15-20 seconds after the end of the block  
480 or trial). The TSA offers a viable alternative to the conventional General Linear Model (GLM) analysis  
481 of the fMRI data. Unlike GLM, TSA does not make the linear time invariance (LTI) assumption, nor  
482 does it assume any pre-defined shape of hemodynamic response function (HRF). Instead, TSA is  
483 completely model free and may be used to discover double-peak behaviour (*Stigliani et al., 2019*)  
484 as well as shape of the hemodynamic response function HRF (*Dale and Buckner, 1997*) for different  
485 voxels. However, given that IT-TSA doesn't combine different time points after the event or block,  
486 it may need larger number of trials as compared to conventional GLM analysis to achieve similar  
487 levels of significance.

488 For naturalistic paradigms such as those used in Neurocinematics (*Hasson, 2004; Hasson et al.,*  
489 *2008*) or other similar experiments (*Simony et al., 2016; Chen et al., 2016*), the TSA offers a much  
490 better alternative to the Inter-Subject Correlation analysis generally used for analysis of the fMRI  
491 data under such paradigms. In such paradigms, the stimulus presented to different subjects is  
492 perfectly aligned and the inter-subject correlations (ISC) are computed to infer brain activations. The  
493 inter-subject temporal synchronization analysis (IS-TSA) gives an instantaneous view of synchronized  
494 activations in different voxels across multiple subjects, whereas the ISC analysis only gives the  
495 aggregate activations for the duration of the experiment. Thus, using the IS-TSA it is possible to  
496 not only find which voxels get activated, but also at what time instants during the experiments  
497 they get activated. Moreover, even in the conventional experimental paradigms, when the stimulus  
498 presented to different subjects are not perfectly aligned, it is possible to use IS-TSA in a manner  
499 similar to IT-TSA, by using a subject-specific baseline that is aligned with the subject-specific stimulus  
500 or event presentations. In this case, multiple repetitions of the stimulus is not needed to get robust  
501 statistics. The IS-TSA can be used to find the entire course of activations of different voxels even for  
502 a single event.

503 The IV-TSA provides an alternate method to carry out analysis similar to the regional homogene-  
504 ity (REHO) (*Jiang and Zuo, 2016*) for fMRI data. For every voxel, a block of voxels in its neighbourhood  
505 may be used to compute the inter-voxel temporal synchronization analysis (IV-TSA). For this analysis,  
506 a baseline such as start of a block or event or average BOLD signal may be used. Thus, for every  
507 voxel, IV-TSA may be computed among its neighbouring voxels (say within a distance of 15mm or in  
508 a 3x3 neighbourhood box), at every time point using the baseline. Thus, IV-TSA gives a temporal  
509 view of the instantaneous synchronization among the neighbouring voxels which is expected to be  
510 closely related to the voxel activations during the presentation of the events.

511 The temporal synchronization analysis TSA provides a powerful and unifying framework for  
512 statistical analysis of fMRI data which will enable fMRI researchers to make many new discoveries.  
513 The IT-TSA and IS-TSA, which does not depend on any of the restrictive GLM assumptions, may  
514 be use to re-analyze the existing fMRI data to make newer discoveries. The IS-TSA may be used  
515 to augment the analysis of fMRI data collected under naturalistic paradigms and provide precise  
516 information about temporal sequence of activations of different voxels. It may also be used to  
517 re-analyze the fMRI data collected using conventional task-based paradigms, especially for the  
518 experiments having a large number of subjects. The IV-TSA may be used to study the temporal



519 dynamics of regionally synchronized BOLD activity at a temporal resolution (as less as 1 TR) that  
520 was not possible earlier.

### 521 **T test analysis**

522 Independent samples t-test analysis was run on the IT-TSA using Scipy toolbox (*Virtanen et al.,*  
523 *2020*) values to determine differences across the synchronization using different ROIs. The max  
524 IT-TSA value across time was averaged across subjects and then compared (t-test) across the voxels  
525 in the task positive and default mode network ROIs from the Schaefer atlas which are depicted in  
526 Fig. 5.

### 527 **Correlation analysis**

528 In order to compute the efficacy of the IS-TSA metric, we computed the IS-TSA per voxel and then  
529 correlated with the HRF convolved stimulus and averaged the pearson correlation across the ROI  
530 and shown in Fig. 8.

### 531 **Intersubject correlation (ISC)**

532 ISC analysis was done with scripts written in Python (*Van Rossum and Drake, 2009*). Voxel wise cor-  
533 relations across subjects are averaged, we get a final ISC map with correlation values. Correlations  
534 were computed as given below using method provided in (*Hasson, 2004; Kauppi, 2010*)

#### 535 **Correlation computation**

To perform ISC, we calculate the correlations in time series of a single voxel across all pairs of subjects.

$$corr(x, y) = \left\{ \frac{1}{T} \sum_{i=1}^T \frac{(x - \mu_x)(y - \mu_y)}{\rho_x * \rho_y} \right\} \quad (8)$$

Where:

- $T$ : length of time series x and y
- $\mu_x$ : mean of time series x
- $\rho_x$ : standard deviation of time series x

$$C^k = \left\{ \frac{2}{N(N-1)} \sum_{i=1}^N \sum_{j=i+1}^N corr(v_i^k(t), v_j^k(t)) \right\} \quad (9)$$

536 Where:

- $v_i^k(t)$ : time series of subject  $i$ , voxel  $k$
- 537  $corr()$ : correlation coefficient method
- $N$ : number of subjects

### 538 **Acknowledgements**

539 The authors would like to thanks Jaspreet Kaur and Varun Kumar for their valuable comments and  
540 inputs. Box figures were created using Biorender. We would like to acknowledge the OpenfMRI  
541 project and NSF Grant OCI-1131441 for the publicly available datasets upon which we conducted  
542 the analyses.

### 543 **Author contributions statement**

544 V.T conducted the experiments. V.T. and R.G. analyzed the results and worked on the manuscript.

## References

- 545  
546 **Aguirre GK**, Zarahn E, D'Esposito M. The variability of human, BOLD hemodynamic responses. *NeuroImage*.  
547 1998; 8(4):360–369. doi: [10.1006/nimg.1998.0369](https://doi.org/10.1006/nimg.1998.0369).
- 548 **Andreasen NC**, O'Leary DS, Cizadlo T, Arndt S, Rezaei K, Watkins GL, Boles Ponto LL, Hichwa RD. Remembering  
549 the past: Two facets of episodic memory explored with positron emission tomography. *American Journal of*  
550 *Psychiatry*. 1995; 152(11):1576–1585. doi: [10.1176/ajp.152.11.1576](https://doi.org/10.1176/ajp.152.11.1576).
- 551 **Bandettini PA**. The BOLD Plot Thickens: Sign- and Layer-Dependent Hemodynamic Changes with Activation.  
552 *Neuron*. 2012; 76(3):468–469. doi: [10.1016/j.neuron.2012.10.026](https://doi.org/10.1016/j.neuron.2012.10.026).
- 553 **Binder J**, Frost J, Hammeke T, Bellgowan PSF, Rao SM, Cox RW. Conceptual processing during the conscious rest-  
554 ing state: A functional MRI study. *Journal of Cognitive ...* 1999; 11(1):80–93. doi: [10.1162/089892999563265](https://doi.org/10.1162/089892999563265).
- 555 **Birn RM**, Saad ZS, Bandettini PA. Spatial heterogeneity of the nonlinear dynamics in the fMRI BOLD response.  
556 *NeuroImage*. 2001; 14(4):817–826. doi: [10.1006/nimg.2001.0873](https://doi.org/10.1006/nimg.2001.0873).
- 557 **Bozhilova N**, Michelini G, Kuntsi J, Asherson P. Mind wandering perspective on ADHD. *Neuroscience and*  
558 *Biobehavioral Reviews*. 2018; 92(July):464–476. doi: [10.1016/j.neubiorev.2018.07.010](https://doi.org/10.1016/j.neubiorev.2018.07.010).
- 559 **Braga RM**, Buckner RL. Parallel Interdigitated Distributed Networks within the Individual Estimated by Intrinsic  
560 Functional Connectivity. *Neuron*. 2017; 95(2):457–471.e5. doi: [10.1016/j.neuron.2017.06.038](https://doi.org/10.1016/j.neuron.2017.06.038).
- 561 **Braga RM**, Van Dijk KRA, Polimeni JR, Eldaief MC, Buckner RL. Parallel distributed networks resolved at high  
562 resolution reveal close juxtaposition of distinct regions. *Journal of Neurophysiology*. 2019; 121(4):1513–1534.  
563 doi: [10.1152/jn.00808.2018](https://doi.org/10.1152/jn.00808.2018).
- 564 **Buckner RL**, Andrews-Hanna JR, Schacter DL. The Brain's Default Network. *Annals of the New York Academy of*  
565 *Sciences*. 2008; 1124(1):1–38. doi: [10.1196/annals.1440.011](https://doi.org/10.1196/annals.1440.011).
- 566 **Buckner RL**, DiNicola LM. The brain's default network: updated anatomy, physiology and evolving insights.  
567 *Nature Reviews Neuroscience*. 2019; 20(10):593–608. doi: [10.1038/s41583-019-0212-7](https://doi.org/10.1038/s41583-019-0212-7).
- 568 **Buckner RL**, Petersen SE, Ojemann JG, Miezin FM, Squire LR, Raichle ME. Functional anatomical studies of explicit  
569 and implicit memory retrieval tasks. *Journal of Neuroscience*. 1995; 15(11):12–29. doi: [10.1523/jneurosci.15-01-00012.1995](https://doi.org/10.1523/jneurosci.15-01-00012.1995).
- 570
- 571 **Chen J**, Honey CJ, Simony E, Arcaro MJ, Norman KA, Hasson U. Accessing Real-Life Episodic Information from  
572 Minutes versus Hours Earlier Modulates Hippocampal and High-Order Cortical Dynamics. *Cerebral Cortex*.  
573 2016; 26(8):3428–3441. doi: [10.1093/cercor/bhv155](https://doi.org/10.1093/cercor/bhv155).
- 574 **Christoff K**, Gordon AM, Smallwood J, Smith R, Schooler JW. Experience sampling during fMRI reveals default  
575 network and executive system contributions to mind wandering. *Proceedings of the National Academy of*  
576 *Sciences*. 2009; 106(21):8719–8724. doi: [10.1073/pnas.0900234106](https://doi.org/10.1073/pnas.0900234106).
- 577 **Christoff K**, Irving ZC, Fox KCR, Spreng RN, Andrews-Hanna JR. Mind-wandering as spontaneous thought: A  
578 dynamic framework. *Nature Reviews Neuroscience*. 2016; 17(11):718–731. doi: [10.1038/nrn.2016.113](https://doi.org/10.1038/nrn.2016.113).
- 579 **Dale AM**, Buckner RL. Selective averaging of individual trials using fMRI. *NeuroImage*. 1997; 5(4 PART II):329–340.  
580 doi: [10.1002/\(SICI\)1097-0193\(1997\)5:5<329::AID-HBM1>3.0.CO;2-5](https://doi.org/10.1002/(SICI)1097-0193(1997)5:5<329::AID-HBM1>3.0.CO;2-5).
- 581 **De Zwart JA**, Silva AC, Van Gelderen P, Kellman P, Fukunaga M, Chu R, Koretsky AP, Frank JA, Duyn  
582 JH. Temporal dynamics of the BOLD fMRI impulse response. *NeuroImage*. 2005; 24(3):667–677. doi:  
583 [10.1016/j.neuroimage.2004.09.013](https://doi.org/10.1016/j.neuroimage.2004.09.013).
- 584 **DiNicola LM**, Braga RM, Buckner RL. Parallel distributed networks dissociate episodic and social functions  
585 within the individual. *Journal of Neurophysiology*. 2020; 123(3):1144–1179. doi: [10.1152/jn.00529.2019](https://doi.org/10.1152/jn.00529.2019), PMID:  
586 32049593.
- 587 **Dixon ML**, Andrews-Hanna JR, Spreng RN, Irving ZC, Mills C, Girn M, Christoff K. Interactions between the  
588 default network and dorsal attention network vary across default subsystems, time, and cognitive states.  
589 *NeuroImage*. 2017; 147(December 2016):632–649. doi: [10.1016/j.neuroimage.2016.12.073](https://doi.org/10.1016/j.neuroimage.2016.12.073).
- 590 **Esterman M**, Noonan SK, Rosenberg M, Degutis J. In the zone or zoning out? Tracking behavioral and neural  
591 fluctuations during sustained attention. *Cerebral Cortex*. 2013; 23(11):2712–2723. doi: [10.1093/cercor/bhs261](https://doi.org/10.1093/cercor/bhs261).

- 592 **Fassbender C**, Zhang H, Buzy WM, Cortes CR, Mizuiri D, Beckett L, Schweitzer JB. A lack of default network  
593 suppression is linked to increased distractibility in ADHD. *Brain Research*. 2009; 1273(916):114–128. doi:  
594 [10.1016/j.brainres.2009.02.070](https://doi.org/10.1016/j.brainres.2009.02.070).
- 595 **Fox MD**, Snyder AZ, Vincent JL, Corbetta M, Van Essen DC, Raichle ME. The human brain is intrinsically organized  
596 into dynamic, anticorrelated functional networks. *Proceedings of the National Academy of Sciences*. 2005;  
597 102(27):9673–9678. doi: [10.1002/poc.610010207](https://doi.org/10.1002/poc.610010207).
- 598 **Fransson P**. Spontaneous low-frequency BOLD signal fluctuations: An fMRI investigation of the resting-state de-  
599 fault mode of brain function hypothesis. *Human Brain Mapping*. 2005; 26(1):15–29. doi: [10.1002/hbm.20113](https://doi.org/10.1002/hbm.20113).
- 600 **Gilbert DT**, Wilson TD. Propection: experiencing the future. *Science*. 2007; 317(September):1351–1355.  
601 doi: [10.1126/science.1144161](https://doi.org/10.1126/science.1144161).
- 602 **Goense J**, Merkle H, Logothetis NK. High-Resolution fMRI Reveals Laminar Differences in Neurovascu-  
603 lar Coupling between Positive and Negative BOLD Responses. *Neuron*. 2012; 76(3):629–639. doi:  
604 [10.1016/j.neuron.2012.09.019](https://doi.org/10.1016/j.neuron.2012.09.019).
- 605 **Greicius M**, Menon V. Default-Mode Activity during a Passive Sensory Task: Uncoupled From Deactivation But  
606 Impacting Activation. *Journal of cognitive neuroscience*. 2004; p. 1484–1492.
- 607 **Gusnard DA**, Raichle ME. Searching for a baseline: Functional Imaging and the Resting Human Brain. *Nature*  
608 *Reviews Neuroscience*. 2001; 2(October).
- 609 **Handwerker DA**, Gonzalez-Castillo J, D'Esposito M, Bandettini PA. The continuing challenge of under-  
610 standing and modeling hemodynamic variation in fMRI. *NeuroImage*. 2012; 62(2):1017–1023. doi:  
611 [10.1016/j.neuroimage.2012.02.015](https://doi.org/10.1016/j.neuroimage.2012.02.015).
- 612 **Handwerker DA**, Ollinger JM, D'Esposito M. Variation of BOLD hemodynamic responses across subjects  
613 and brain regions and their effects on statistical analyses. *NeuroImage*. 2004; 21(4):1639–1651. doi:  
614 [10.1016/j.neuroimage.2003.11.029](https://doi.org/10.1016/j.neuroimage.2003.11.029).
- 615 **Hasson U**. Intersubject Synchronization of Cortical Activity During Natural Vision. *Science*. 2004; 303(5664):1634–  
616 1640. doi: [10.1126/science.1089506](https://doi.org/10.1126/science.1089506).
- 617 **Hasson U**, Furman O, Clark D, Dudai Y, Davachi L. Enhanced Intersubject correlations during  
618 Movie Viewing Correlate with Successful Episodic Encoding. *Neuron*. 2009; 57(3):452–462. doi:  
619 [10.1016/j.neuron.2007.12.009](https://doi.org/10.1016/j.neuron.2007.12.009).Enhanced.
- 620 **Hasson U**, Landesman O, Knappmeyer B, Vallines I, Rubin N, Heeger DJ. Neurocinematics: The Neuroscience of  
621 Film. *Projections*. 2008; 2(1):1–26. doi: [10.3167/proj.2008.020102](https://doi.org/10.3167/proj.2008.020102).
- 622 **Heinzle J**, Koopmans PJ, den Ouden HEM, Raman S, Stephan KE. A hemodynamic model for layered BOLD  
623 signals. *NeuroImage*. 2016; 125:556–570. doi: [10.1016/j.neuroimage.2015.10.025](https://doi.org/10.1016/j.neuroimage.2015.10.025).
- 624 **Jenkinson M**, Beckmann CF, Behrens TEJ, Woolrich MW, Smith SM. FSL. *NeuroImage*. 2012; 62(2):782 – 790. doi:  
625 [10.1016/j.neuroimage.2011.09.015](https://doi.org/10.1016/j.neuroimage.2011.09.015), 20 YEARS OF fMRI.
- 626 **Jessica R Andrews-Hanna**. The Brain's Default Network and its Adaptive Role in Internal Mentation. *Neurosci-*  
627 *entist*. 2012; 18(3):251–270. doi: [10.1177/1073858411403316](https://doi.org/10.1177/1073858411403316).
- 628 **Jiang L**, Zuo XN. Regional Homogeneity: A Multimodal, Multiscale Neuroimaging Marker of the Human  
629 Connectome. *Neuroscientist*. 2016; 22(5):486–505. doi: [10.1177/1073858415595004](https://doi.org/10.1177/1073858415595004).
- 630 **Kauppi**. Inter-subject correlation of brain hemodynamic responses during watching a movie: localization in  
631 space and frequency. *Frontiers in Neuroinformatics*. 2010; 4(March):1–10. doi: [10.3389/fninf.2010.00005](https://doi.org/10.3389/fninf.2010.00005).
- 632 **Kim J**, Wang J, Wedell DH, Shinkareva SV. Identifying core affect in individuals from fMRI responses to dynamic  
633 naturalistic audiovisual stimuli. *PLoS ONE*. 2016; 11(9):1–21. doi: [10.1371/journal.pone.0161589](https://doi.org/10.1371/journal.pone.0161589).
- 634 **Lewis LD**, Setsompop K, Rosen BR, Polimeni JR. Stimulus-dependent hemodynamic response timing across  
635 the human subcortical-cortical visual pathway identified through high spatiotemporal resolution 7T fMRI.  
636 *NeuroImage*. 2018; doi: [10.1016/j.neuroimage.2018.06.056](https://doi.org/10.1016/j.neuroimage.2018.06.056).
- 637 **Li CSR**, Yan P, Bergquist KL, Sinha R. Greater activation of the “default” brain regions predicts stop signal errors.  
638 *NeuroImage*. 2007; 38(3):640 – 648. doi: [10.1016/j.neuroimage.2007.07.021](https://doi.org/10.1016/j.neuroimage.2007.07.021).

- 639 **Logothetis NK**. What we can do and what we cannot do with fMRI. *Nature*. 2008; 453(7197):869–878. doi:  
640 10.1038/nature06976.
- 641 **Logothetis NK, Wandell BA**. Interpreting the BOLD Signal. *Annual Review of Physiology*. 2004; 66(1):735–769.  
642 doi: [10.1146/annurev.physiol.66.082602.092845](https://doi.org/10.1146/annurev.physiol.66.082602.092845).
- 643 **Mathias EJ, Kenny A, Plank MJ, David T**. Integrated models of neurovascular coupling and BOLD  
644 signals: Responses for varying neural activations. *NeuroImage*. 2018; 174(March):69–86. doi:  
645 [10.1016/j.neuroimage.2018.03.010](https://doi.org/10.1016/j.neuroimage.2018.03.010).
- 646 **Mayhew SD, Ostwald D, Porcaro C, Bagshaw AP**. Spontaneous EEG alpha oscillation interacts with positive  
647 and negative BOLD responses in the visual-auditory cortices and default-mode network. *NeuroImage*. 2013;  
648 76:362–372. doi: [10.1016/j.neuroimage.2013.02.070](https://doi.org/10.1016/j.neuroimage.2013.02.070).
- 649 **Mazoyer B, Zago L, Mellet E, Bricogne S, Etard O, Houde O, Crivello F, Joliot M, Petit L**. Cortical networks for  
650 working memory and executive functions sustain the conscious resting state in man. *Brain Research Bulletin*.  
651 2001; 54(3):287–298. doi: [10.1016/s0361-9230\(00\)00437-8](https://doi.org/10.1016/s0361-9230(00)00437-8).
- 652 **McCormick EM, Telzer EH**. Contributions of default mode network stability and deactivation to adolescent task  
653 engagement. *Scientific Reports*. 2018; 8(1):18049. doi: [10.1038/s41598-018-36269-4](https://doi.org/10.1038/s41598-018-36269-4).
- 654 **Mckiernan KA, Kaufman JN, Kucera-thompson J, Binder JR**. Mckiernan 2003 - A parametric manipulation of  
655 factors affecting task-induced deactivation in fmri.pdf. *Journal of Cognitive Neuroscience*. 2003; 15:394–408.  
656 doi: [10.1162/089892903321593117](https://doi.org/10.1162/089892903321593117).
- 657 **Miezin FM, Maccotta L, Ollinger JM, Petersen SE, Buckner RL**. Characterizing the hemodynamic response: Effects  
658 of presentation rate, sampling procedure, and the possibility of ordering brain activity based on relative  
659 timing. *NeuroImage*. 2000; 11(6 1):735–759. doi: [10.1006/nimg.2000.0568](https://doi.org/10.1006/nimg.2000.0568).
- 660 **Mohan A, Roberto AJ, Mohan A, Lorenzo A, Jones K, Carney MJ, Liogier-Weyback L, Hwang S, Lapidus KAB**. The  
661 significance of the Default Mode Network (DMN) in neurological and neuropsychiatric disorders: A review.  
662 *Yale Journal of Biology and Medicine*. 2016; 89(1):49–57. doi: [10.1103/PhysRevC.70.054306](https://doi.org/10.1103/PhysRevC.70.054306).
- 663 **Mowinckel AM, Alnæs D, Pedersen ML, Ziegler S, Fredriksen M, Kaufmann T, Sonuga-Barke E, Endestad T,  
664 Westlye LT, Biele G**. Increased default-mode variability is related to reduced task-performance and is evident  
665 in adults with ADHD. *NeuroImage: Clinical*. 2017; 16(March):369–382. doi: [10.1016/j.nicl.2017.03.008](https://doi.org/10.1016/j.nicl.2017.03.008).
- 666 **Nathan Spreng R**. The fallacy of a "task-negative" network. *Frontiers in Psychology*. 2012; 3(MAY):1–5. doi:  
667 [10.3389/fpsyg.2012.00145](https://doi.org/10.3389/fpsyg.2012.00145).
- 668 **Ojemann GA, Ramsey NF, Ojemann J**. Relation between functional magnetic resonance imaging (fMRI) and  
669 single neuron, local field potential (LFP) and electrocorticography (ECoG) activity in human cortex. *Frontiers in  
670 Human Neuroscience*. 2013; 7(JAN):1–9. doi: [10.3389/fnhum.2013.00034](https://doi.org/10.3389/fnhum.2013.00034).
- 671 **Ossandon T, Jerbi K, Vidal JR, Bayle DJ, Henaff MA, Jung J, Minotti L, Bertrand O, Kahane P, Lachaux JP**. Tran-  
672 sient Suppression of Broadband Gamma Power in the Default-Mode Network Is Correlated with Task  
673 Complexity and Subject Performance. *The Journal of Neuroscience*. 2011; 31(41):14521–14530. doi:  
674 [10.1523/JNEUROSCI.2483-11.2011](https://doi.org/10.1523/JNEUROSCI.2483-11.2011).
- 675 **Poldrack RA, Barch DM, Mitchell JP, Wager TD, Wagner AD, Devlin JT, Cumba C, Koyejo O, Michael P**. Toward open  
676 sharing of task-based fMRI data : the OpenfMRI project. *Frontiers in Neuroinformatics*. 2013; 7(July):1–12.  
677 doi: [10.3389/fninf.2013.00012](https://doi.org/10.3389/fninf.2013.00012).
- 678 **Polli FE, Barton JJS, Cain MS, Thakkar KN, Rauch SL, Manoach DS**. Rostral and dorsal anterior cingulate cortex  
679 make dissociable contributions during antisaccade error commission. *Proceedings of the National Academy  
680 of Sciences*. 2005; 102(43):15700–15705. doi: [10.1073/pnas.0503657102](https://doi.org/10.1073/pnas.0503657102).
- 681 **Popa D, Popescu AT, Pare D**. Contrasting activity profile of two distributed cortical networks as a function of at-  
682 tentional demands. *J Neurosci*. 2009; 29(4):1191–1201. doi: [10.1523/JNEUROSCI.4867-08.2009.CONTRASTING](https://doi.org/10.1523/JNEUROSCI.4867-08.2009.CONTRASTING).
- 683 **Querne L, Fall S, Le Moing AG, Bourel-Ponchel E, Delignières A, Simonnot A, de Broca A, Gondry-Jouet  
684 C, Boucart M, Berquin P**. Effects of Methylphenidate on Default-Mode Network/Task-Positive Network  
685 Synchronization in Children With ADHD. *Journal of Attention Disorders*. 2017; 21(14):1208–1220. doi:  
686 [10.1177/1087054713517542](https://doi.org/10.1177/1087054713517542).
- 687 **Raichle ME**. The brain's default mode network. *Annu Rev Neurosci*. 2015; 38(April):433–447. doi:  
688 [10.1146/annurev-neuro-071013-014030](https://doi.org/10.1146/annurev-neuro-071013-014030).

- 689 **Raichle ME**, MacLeod AM, Snyder AZ, Powers WJ, Gusnard DA, Shulman GL. A default mode of brain function.  
690 *Proceedings of the National Academy of Sciences*. 2001; 98(2):676–682. doi: [10.1073/pnas.98.2.676](https://doi.org/10.1073/pnas.98.2.676).
- 691 **Saad ZS**, Ropella KM, Cox RW, DeYoe EA. Analysis and use of fMRI response delays. *Human Brain Mapping*.  
692 2001; 13(2):74–93. doi: [10.1002/hbm.1026](https://doi.org/10.1002/hbm.1026).
- 693 **Saxe R**, Kanwisher N. People thinking about thinking people: The role of the temporo-parietal junction in  
694 "theory of mind". *NeuroImage*. 2003; 19(4):1835–1842. doi: [10.1016/S1053-8119\(03\)00230-1](https://doi.org/10.1016/S1053-8119(03)00230-1).
- 695 **Schacter DL**, Addis DR, Buckner RL. Remembering the past to imagine the future: The prospective brain. *Nature*  
696 *Reviews Neuroscience*. 2007; 8(9):657–661. doi: [10.1038/nrn2213](https://doi.org/10.1038/nrn2213).
- 697 **Schaefer A**, Kong R, Gordon EM, Laumann TO, Zuo XN, Holmes AJ, Eickhoff SB, Yeo BTT. Local-Global Parcellation  
698 of the Human Cerebral Cortex from Intrinsic Functional Connectivity MRI. *Cerebral Cortex*. 2018; 28(9):3095–  
699 3114. doi: [10.1093/cercor/bhx179](https://doi.org/10.1093/cercor/bhx179).
- 700 **Seabold S**, Perktold J. statsmodels: Econometric and statistical modeling with python. In: *9th Python in Science*  
701 *Conference*; 2010. p. 92–96.
- 702 **Shmuel A**, Yacoub E, Pfeuffer J, Van de Moortele PF, Adriany G, Hu X, Ugurbil K. Sustained negative BOLD, blood  
703 flow and oxygen consumption response and its coupling to the positive response in the human brain. *Neuron*.  
704 2002; 36(6):1195–1210. doi: [10.1016/S0896-6273\(02\)01061-9](https://doi.org/10.1016/S0896-6273(02)01061-9).
- 705 **Shulman GL**, Fiez JA, Corbetta M, Buckner RL, Miezin FM, Raichle ME, Petersen SE. Common Blood Flow Changes  
706 across Visual Tasks: II. Decreases in Cerebral Cortex. *Journal of Cognitive Neuroscience*. 1997; 9(5):648–663.  
707 doi: [10.1162/jocn.1997.9.5.648](https://doi.org/10.1162/jocn.1997.9.5.648), PMID: 23965122.
- 708 **Simony E**, Honey CJ, Chen J, Lositsky O, Yeshurun Y, Wiesel A, Hasson U. Dynamic reconfiguration of the default  
709 mode network during narrative comprehension. *Nature Communications*. 2016; 7(May 2015):12141. doi:  
710 [10.1038/ncomms12141](https://doi.org/10.1038/ncomms12141).
- 711 **Singh KD**, Fawcett IP. Transient and linearly graded deactivation of the human default-mode network by a visual  
712 detection task. *NeuroImage*. 2008; 41(1):100–112. doi: [10.1016/j.neuroimage.2008.01.051](https://doi.org/10.1016/j.neuroimage.2008.01.051).
- 713 **Smets PAM**, Kroese FM, Evers C, De Ridder DTD. Allured or alarmed: Counteractive control responses to food  
714 temptations in the brain. *Behavioural Brain Research*. 2013; 248:41–45. doi: [10.1016/j.bbr.2013.03.041](https://doi.org/10.1016/j.bbr.2013.03.041).
- 715 **Soares JM**, Marques P, Magalhães R, Santos NC, Sousa N. The association between stress and mood across  
716 the adult lifespan on default mode network. *Brain Structure and Function*. 2017; 222(1):101–112. doi:  
717 [10.1007/s00429-016-1203-3](https://doi.org/10.1007/s00429-016-1203-3).
- 718 **Soltysik DA**, Peck KK, White KD, Crosson B, Briggs RW. Comparison of hemodynamic response nonlinearity  
719 across primary cortical areas. *NeuroImage*. 2004; 22(3):1117–1127. doi: [10.1016/j.neuroimage.2004.03.024](https://doi.org/10.1016/j.neuroimage.2004.03.024).
- 720 **Spreng RN**, Mar RA, Kim ASN. The Common Neural Basis of Autobiographical Memory, Propection, Navigation,  
721 Theory of Mind, and the Default Mode: A Quantitative Meta-analysis. *Journal of Cognitive Neuroscience*. 2009;  
722 21(3):489–510. doi: [10.1162/jocn.2008.21029](https://doi.org/10.1162/jocn.2008.21029), PMID: 18510452.
- 723 **Stigliani A**, Jeska B, Grill-Spector K. Differential sustained and transient temporal processing across visual  
724 streams. *PLoS Computational Biology*. 2019; 15(5):1–26. doi: [10.1371/journal.pcbi.1007011](https://doi.org/10.1371/journal.pcbi.1007011).
- 725 **Tripathi V**, Bharadwaj P. Neuroscience of the Yogic Theory of Mind and Consciousness. *PsyArxiv*. 2021; p. 1–26.  
726 doi: [10.31234/osf.io/ka73h](https://doi.org/10.31234/osf.io/ka73h).
- 727 **Van Rossum G**, Drake FL. *Python 3 Reference Manual*. Scotts Valley, CA: CreateSpace; 2009.
- 728 **Virtanen P**, Gommers R, Oliphant TE, Haberland M, Reddy T, Cournapeau D, Burovski E, Peterson P, Weckesser  
729 W, Bright J, van der Walt SJ, Brett M, Wilson J, Millman KJ, Mayorov N, Nelson ARJ, Jones E, Kern R, Larson E,  
730 Carey CJ, et al. SciPy 1.0: fundamental algorithms for scientific computing in Python. *Nature Methods*. 2020;  
731 17(3):261–272. doi: [10.1038/s41592-019-0686-2](https://doi.org/10.1038/s41592-019-0686-2).
- 732 **Walz JM**, Goldman RI, Carapezza M, Muraskin J, Bron TR, Sajda P. Simultaneous EEG-fMRI Reveals a Temporal  
733 Cascade of Task- Related and Default-Mode Activations During a Simple Target Detection Task. *Neuroimage*.  
734 2014; 102(01):229–239. doi: [10.1016/j.neuroimage.2013.08.014.Simultaneous](https://doi.org/10.1016/j.neuroimage.2013.08.014.Simultaneous).
